1  
2  
3  
4  
5  
6  
7  
8  
9  
10  
11  
12  
13  
14  
15  
16  
17  
18  
19  
20  
21  
22

***Mental health services implementation in Colombia – a systematic review***

Germán Andrés Alarcón Garavito<sup>1¶\*</sup>, Rochelle Burgess<sup>1&</sup>, María Cecilia Dedios Sanguinetti<sup>2&</sup>,  
Laura E.R. Peters<sup>3¶</sup> and Norha Vera San Juan<sup>1¶</sup>.

<sup>1</sup>Institute for Global Health - University College London, London, United Kingdom.

<sup>2</sup>School of Government - Universidad de los Andes, Bogota, Colombia.

<sup>3</sup>Institute for Risk and Disaster Reduction, University College London, United Kingdom -  
College of Earth, Ocean, and Atmospheric Sciences, Oregon State University, United States of  
America.

\* Corresponding author

E-mail: [german.alarcon.20@ucl.ac.uk](mailto:german.alarcon.20@ucl.ac.uk) (GA-AG)

<sup>¶</sup>These authors contributed equally to this work.

23 &These authors also contributed equally to this work.

## 24 **Abstract**

25 Colombia's mental health services have a complex history shaped by 60 years of armed  
26 conflict, a predominantly clinical approach to mental health, and social factors such as  
27 inequities and stigma. The 1990 Caracas declaration proposed a shift towards decentralised  
28 community mental health services and interventions based on the recovery approach and  
29 emphasis on social determinants of mental health in the Americas. Colombia has adopted  
30 these approaches in its legal and practical framework in recent years, but implementation  
31 has been uneven. This systematic review aims to contribute to mental health services  
32 understanding in Colombia by reviewing published studies about mental health services and  
33 interventions.

34 A search was conducted to explore peer-reviewed studies on Colombian mental health  
35 services across five databases (Medline, PubMed, Scopus, Scielo and BVS [Biblioteca Virtual  
36 de Salud in Spanish]) on papers published in the last ten years and without language  
37 restrictions. The Consolidated Framework for Implementation Research (CFIR) was used to  
38 structure the analysis and identify barriers and facilitators during the implementation of  
39 mental health services. We adapted the CFIR to attend to gender, race and age informed by  
40 the Socio-Political Economy of Global Mental Health framework, given the importance of  
41 these factors to the Colombian health landscape.

42 1 530 records were identified, and 12 articles met all inclusion criteria and were included in  
43 the analysis. 8 papers described substance use disorders services, 11 involved  
44 multidisciplinary healthcare professionals, and 7 were implemented at a local scale. The

45 primary barriers to implementation were the lack of coordination, high workloads, and low  
46 funding. Facilitators included the use of protocols, and the involvement of communities,  
47 stakeholders, users, and external champions.

48 Findings suggest the continued importance of community and recovery approaches and  
49 efforts to improve coordination between multi-sector actors involved in the mental health  
50 spaces (e.g., public, and private organisations, users and their families).

## 51 **Introduction**

52 In the last 30 years, mental health systems and services have received more attention and  
53 urgency to prioritise by governments. Global crisis such as the COVID-19 pandemic has  
54 soared pressure on people's mental health and has risen general mental health awareness.  
55 Nevertheless, how governments and mental health systems should respond is still a general  
56 debate. For instance, Colombia has advanced in building a relative robust health policy space  
57 to address these challenges. However, translating visions and concepts into real-world  
58 changes tends to be a convoluted pathway full of barriers and enablers, which should be  
59 avoided and supported respectively to achieve the goals and objectives articulated in policy  
60 documents (1).

## 61 **Global and regional situation**

62 In 2007, *The Lancet* launched the first global mental health series outlining the treatment  
63 gaps in low-and-middle-income countries (LMICs) and the necessity of better cost-effective  
64 mental health interventions (2). Furthermore, the ratification of the Sustainable  
65 Development Goals in 2015 included the prevention and promotion of mental health with a  
66 strong emphasis on substance abuse, including the use of alcohol (3).

67 The WHO Mental Health Action Plan 2013-2020 led many states along pathways to  
68 strengthen leadership and governance for mental health, increase the provision of mental  
69 and social care services and support better information systems for evidence and research  
70 (4). In Latin America, such efforts are predated by the *Caracas Declaration of Mental Health,*  
71 *and Human Rights* from 1990, which highlighted the necessity of adapting primary care  
72 lenses and community-based services in mental health. It also promoted more team  
73 planning and the reduction of the role of institutionalization in mental health services,  
74 expanding voices in mental health spaces (5).

75 Critiques against the global mental health agenda remain. Many report of the limited  
76 consultation with social scientists, people with psychosocial disabilities, victims of negative  
77 mental health services, and others (6). Moreover, analysts also argue that the proposed  
78 mental health models are limited by "Western" neo-colonial lenses, disregarding traditional  
79 and cultural understandings of mental health interpretations (7). This situation fosters the  
80 replication of services solely built on the biomedical model.

81 One of the consequences is that non-pharmaceutical interventions such as psychotherapy or  
82 community-based programs are actively overlooked. Also called "psychiatrisation," the  
83 biomedical perspective favours pharmaceutical companies, governmental supporters behind  
84 them, and even some psychiatry and mental health practitioners. This scenario has  
85 facilitated a profitable world market for these companies and their stakeholders (8). The  
86 prioritisation of pharmacological treatment has also produced a normalisation of adverse  
87 effects of psychiatric medications, which are incredibly relevant and should be reported to  
88 regulatory agencies and manufacturers for quality and research purposes (9,10).

89 Furthermore, in Latin America, the outlook on mental health financing is complex. It is not a  
90 surprise that high-income countries (HICs) spend more on mental health than they do on  
91 other health problems. While HICs' funding is around 5% of the total health budget, LMICs' is  
92 between 2 and 9 times less. Overall, the percentage of the budget used on mental health  
93 services is not proportional to the negative impact that none or limited mental health  
94 provision generates in society, as stated by multiple experts in the last 20 years (11,12).

95 In the Americas in 2018, the treatment gap for mental disorders was up to 71.2% for any  
96 mental disorder and 65.7% for severe to moderate disorders. The difference between North  
97 and South America is evident, considering that the treatment gap for substance abuse is  
98 83.7% and 69.1%, respectively. Some individual factors behind this reality are the lack of  
99 belief in treatment, financial barriers, and stigma, among others (13).

100

## 101 **Mental health policies and services in Colombia**

102 Colombia has suffered decades of violence which has had a major impact on Colombians'  
103 mental health (14). More than 60 years of internal conflict (1960) have fractured social  
104 structures and intensified the transmission of communicable and non-communicable  
105 diseases (14). War tactics like massacres, anti-personnel landmines, and gender-based and  
106 sexual violence drove internal displacement and the escalation of substance abuse (15).  
107 These circumstances can also trigger a plethora of mental health difficulties among victims  
108 (including legal and illegal armed forces, civilians, and foreigners) (14).

109 According to the National Health Institute of Colombia, the consequences of armed conflict  
110 on mental health include high rates of post-traumatic stress disorder (PTSD), depression,

111 anxiety, and suicidal conduct (14). Additionally, the conflict directly affected human  
112 healthcare resources due to direct attacks on the workforce, causing a cessation in the  
113 training of new healthcare professionals (HCPs) in some regions such as Arauca, Guaviare,  
114 Caquetá and Putumayo, which were the regions with the highest indicators of violent  
115 conflict intensity (14). Healthcare services became increasingly urban-based due to the  
116 intensified violence that led to the reduction of healthcare centres in conflict-affected rural  
117 areas, and many people stopped accessing care due to mobility limitations and financial  
118 hardship (14).

119 In 1993, the National Law 100 determined that healthcare services must be administered  
120 and partially operated by healthcare insurers (Empresas Promotoras de Salud [EPS] in  
121 Spanish), and the population was divided into two income-based schemes; subsidised and  
122 contributory (16). Insurers hire providers (private practitioners, hospitals, clinics,  
123 laboratories) to deliver health services stated in the national health benefits packages (Plan  
124 de Beneficios en Salud (PBS) in Spanish) (17).

125 This law established a legal right to healthcare based on opportunity, quality, and  
126 comprehensive coverage. Healthcare coverage increased from 23% to 97% (18), with a  
127 benefits package affordable for most of the population (19). However, the law weakened  
128 mental health services, revoking programs like Day Hospitals, restricting access to  
129 psychotherapy after one month, and only covering early-stage treatment (19).  
130 Consequently, the number of legal actions (also known as "*Tutelas*" in Colombia) against  
131 healthcare insurers skyrocketed. These oversights required a range of reforms, new policies,  
132 and amends.

133 One of these reforms was the first version of the National Mental Health Policy in 1998,  
134 strengthened with the Mental Health Law in 2013 (20,21). These legal and strategic  
135 frameworks aimed to improve access, quality, and coverage. However, their local  
136 implementation has been limited and insufficient (12). According to Holguín and Sanmartín-  
137 Rueda (2018) (23) current mental health services in Colombia are centred on financial  
138 profitability for insurers, and due to weak inspection and regulation, numerous deficiencies  
139 in the flow of financial assets, and corruption lawsuits, the legal right to healthcare has been  
140 undermined.

141 In parallel at the social level, stigma, which compromises service quality worldwide, has been  
142 categorised as one of the most notable factors that prevent accessing mental health services  
143 in Colombia (24). According to Campo-Arias, Oviedo and Herazo (2014) (26) the most  
144 common sources of stigma are the surrounding community, family, employees and  
145 colleagues, and media. People believe that the only causes of mental disorders are  
146 substance abuse, brain disease, and spiritual reasons such as evil spirits or "God's  
147 punishments". This lack of additional understanding may be due to a deficiency of available  
148 information regarding mental health disorders' nature and multiple causes.

149 On the whole, there is a global and regional space with ideas on mental health approaches,  
150 and Colombia is aiming to develop laws and policies influenced by these ideas and supported  
151 by massive surveys and monitoring actions such as the National Mental Health Survey in  
152 2015 or the 2021 mental health statistical reports by the National Statistical System  
153 (Departamento Administrativo Nacional de Estadística or DANE in Spanish). Thus, both the  
154 National Mental Health Law and Policy have represented an opportunity for Colombia to  
155 develop integrated mental health models and frameworks based on national evidence, and

156 community approaches and consider the social determinants of mental health (SDMH).  
157 However, multiple studies, independent reports and civil complaints spell out the decay of  
158 mental health services and how they are failing to satisfy mental health care needs (27–33),  
159 demonstrating that this supportive policy environment does not automatically translate into  
160 effective and accessible services in practice.

## 161 **Aim**

162 Despite the robust mental health policy environment in Colombia, there is a gap on why  
163 implementation failures remain. The purpose of this paper is to identify the barriers  
164 contributing to these gaps in delivering effective and accessible services aligning with policy  
165 ambitions. It also aims to contribute to existing knowledge by identifying the facilitators for  
166 implementing mental health services in Colombia.

167 The following research questions guided this review:

- 168 1. What are the reported mental health services in Colombia?
- 169 2. What are the main challenges with the implementation of mental health services?
- 170 3. What are the facilitators of the implementation of mental health services?

171

## 172 **Methods**

### 173 **Design and approach**

174 This systematic review included chronological identification, screening, selection and  
175 synthesis (34,35), and followed a systematic approach to ensuring that all the available  
176 information was incorporated (35). This systematic review was conducted following the



177 Preferred Reporting Items for Systematic reviews and Meta-Analyses (PRISMA) guidelines.

178 No formal protocol was developed or published for this review.

179

## 180 **Implementation science framework**

181 The relevance of evidence for decision-making in policy is well known, especially in  
182 healthcare. Healthcare settings are usually complex environments, with limited resources  
183 and multiple actors, behaviours, and structures that complicate taking decisions (36). While  
184 the production of evidence rises every day, it is a well-known fact that without methodical  
185 adoption processes for both clinical and non-clinical interventions, significant changes in  
186 health outcomes cannot be expected (37). Therefore, it is crucial to determine whether  
187 evidence can be implemented and what impedes its acceptance.

188 Implementation science's scope goes beyond individuality, considering the context and  
189 structure of the settings where the implementation is operating (38). Some vital elements of  
190 implementation sciences are the frameworks and theories involved and their evaluation  
191 processes (36).

192 To increase the comparability of the results of this review, we used the CFIR. It comprises 39  
193 different constructs divided into five domains: intervention characteristics, outer setting,  
194 inner setting, individual characteristics, and process (39). The CFIR was chosen because it  
195 provides a high-quality and integrative tool to assess implementation processes in multiple  
196 disciplines. In English et al., (2011) (41) this tool proved to be valuable to guide  
197 implementation assessments in an under-funded setting in Kenya, comparable to the  
198 Colombian settings. Nevertheless, the same study acknowledged that not all the constructs

199 can be used in all scenarios due to a lack of available data or the reduced applicability of  
 200 domains or constructs. Likewise, for this work, we only used the appropriate constructs from  
 201 four domains, which are defined in table 1.

202 **Table 1. Overview of the CFIR**

| Domain                       | Definition                                                                                                           | Selected constructs                                                                                                                    |
|------------------------------|----------------------------------------------------------------------------------------------------------------------|----------------------------------------------------------------------------------------------------------------------------------------|
| Intervention characteristics | The influence of essential and adaptable interacting components in the success of implementation.                    | Intervention source<br>Evidence strength & quality<br>Relative advantage<br>Design quality & packing<br>Cost                           |
| Outer setting                | It is the external framework where the entire process resides. It includes economic, political, and social contexts. | Patient needs & resources<br>External policies & incentives                                                                            |
| Inner setting                | It includes structural features of politics and culture, through which the implementation process will be shaped.    | Structural characteristics<br>Implementation climate<br>Tension for Change<br>Available resources<br>Access to knowledge & information |
| Individual characteristics   | Features of people who actively experiences during the implementation based on their mindset.                        | Not used in this review                                                                                                                |
| Process                      | Group of sub-processes progressing simultaneously at multiple levels within the organization.                        | Planning<br>Engaging<br>Executing<br>Reflecting & Evaluating                                                                           |

203

204 The domain of characteristics of individuals was not used since very little data from included  
205 studies was about individuals' beliefs, features, or capabilities. Furthermore, as the CFIR is  
206 focused on institutions and organisational problematics during implementation, factors such  
207 as religious beliefs, gender, ethnicity, or race are not actively considered within the  
208 framework despite their significant influence on mental health services. To cover these  
209 missing factors, we adapted the CFIR adding a new domain of socio-political economy in  
210 mental health based on the Socio-Political Economy of Global mental health framework  
211 proposed by Burgess et al., (2022) (43)

212 Specifically, we included three of their nine factors: I. Gender and sexuality, II. Racism, caste,  
213 xenophobia, and III. Age and disability. These factors were selected because they allowed us  
214 to explore their influence on determining mental health, their representation in the  
215 literature, and the existence of relevant information. We did not include other proposed  
216 factors such as religion, spirituality, or neighbourhood dynamics due to a foreseeable lack of  
217 information, while political dynamics were not incorporated since this kind of information  
218 was covered by the CFIR (domain of outer setting, construct of external policies and  
219 incentives).

220

## 221 **Search strategy**

### 222 *Databases*

223 The literature search was performed between June and July 2021 using five databases:  
224 Medline (OVID), PubMed, Scopus, Scielo and BVS (Biblioteca Virtual de Salud in Spanish).  
225 These databases were selected because of the amount of peer-reviewed available

226 information, and in the case of Scielo and BVS, due to their inclusion of Latin American  
227 literature.

#### 228 *Search equation*

229 The search terms were established based on MeSH (Medical Subject Headings) terms and  
230 the Spanish counterpart DeCS (Descriptores en Ciencias de la Salud in Spanish) for mental  
231 health. Search terms included relevant words to refer to mental health and Colombia. It was  
232 necessary to use broad search terms because key literature results did not appear during  
233 preliminary searches. Detailed searching terms and combination strategies are described in

#### 234 **S1 Appendix 1. Search strategy.**

235 Location terms included the names of the five principal cities with more than one million  
236 inhabitants in Colombia. These cities were incorporated in the searches done in Scopus,  
237 Medline (OVID) and PubMed because it was noticed during earlier search checks that  
238 multiple possible eligible studies did not mention the country but specifically a city. It was  
239 also noted that using this strategy with the Boolean term "OR" did not risk losing data  
240 because studies mentioned at least the country or a city. This strategy was unnecessary in  
241 either Scielo or BVS since adding city names significantly lost results.

242 The search was limited between 2011 and 2021 to capture the most current state of mental  
243 health systems in Colombia while still capturing significant modifications of mental health  
244 policies (e.g., The Decennial Public Health Plan in 2012, National Mental Health Law in 2013),  
245 and the first years after the sign of the peace agreement in 2016 (44). Articles were screened  
246 at the title and abstract level using *Rayyan* software (45) based on the specific inclusion and  
247 exclusion criteria presented in Table 2.

248

249

**Table 2. Inclusion and exclusion criteria**

| Main aspect                                       | Inclusion criteria                                                                                                                                                                                                                                                                                                                                                                  |
|---------------------------------------------------|-------------------------------------------------------------------------------------------------------------------------------------------------------------------------------------------------------------------------------------------------------------------------------------------------------------------------------------------------------------------------------------|
| Type of documents                                 | Published peer-reviewed papers or manuscripts where mental health services were mentioned and/or described.                                                                                                                                                                                                                                                                         |
| Publication period                                | January 1, 2011, to July 01, 2021                                                                                                                                                                                                                                                                                                                                                   |
| Language of publication                           | No restriction                                                                                                                                                                                                                                                                                                                                                                      |
| Include policy, programs/interventions/strategies | That applied or implemented any of the following: <ul style="list-style-type: none"> <li>– Mental health services such as: <ul style="list-style-type: none"> <li>○ Psychiatric hospitalization, psychotherapy, outpatient and inpatient mental health treatment, recovery, and complementary/alternative treatments, medication programs.</li> </ul> </li> </ul>                   |
| Country of focus                                  | Colombia                                                                                                                                                                                                                                                                                                                                                                            |
| Main aspects                                      | <b>Exclusion criteria</b>                                                                                                                                                                                                                                                                                                                                                           |
| Type of documents                                 | <ul style="list-style-type: none"> <li>– Manuscripts, files, or reports that are not openly available.</li> <li>– Editorial or comments.</li> <li>– Newspaper articles.</li> <li>– Scoping/systematic reviews.</li> </ul>                                                                                                                                                           |
| Type of services, actions, or interventions       | <ul style="list-style-type: none"> <li>– Mental health services that are not currently working or are due to be discontinued.</li> <li>– Mental health services that were part of development programs but were stopped.</li> <li>– Studies or publications that are only focused on characterizing and/or analyse mental health disorders (prevalence/incidence rates).</li> </ul> |

250

## 251 **Data extraction**

252 All the information was charted in an *Excel* data extraction form developed following the  
253 research objectives and based on the CFIR and the Socio-Political Economy of Global Mental  
254 Health framework.

255 Data included basic information (authors, year) and identification (e.g., mental health  
256 problem addressed, level of healthcare service, human resources, and population, among  
257 others). This review classified interventions into psychiatric hospitalisation, psychotherapy,

258 outpatient and inpatient mental health treatment, complementary/alternative treatments,  
259 and medication programs.

260 Moreover, the classification of mental health services in the Colombian healthcare system is  
261 divided into three levels. First (I) level (low) for basic ambulatory care principally in small  
262 municipalities, second (II) (medium) for specialised HCPs with medium-range medical  
263 technology and third (III) (high) with the highest level of technology and subspecialised  
264 personnel (46). Likewise, the coverage was considered local (small municipalities), regional  
265 (a whole department/state) and national.

266 Initial data extraction was performed on a first version with two studies to verify the  
267 practicability of the extraction form. After some adjustments, the extraction was completed  
268 with all the selected studies. The CFIR was adapted based on the nature of these  
269 interventions and the reported information. Therefore, all the domains except for one  
270 (individual characteristics) were included. Lastly, information was incorporated using a  
271 narrative synthesis method, which facilitated the categorisation of synthesised data and  
272 their organisation in text categories (47).

## 273 **Results**

274

### 275 **Study selection**

276 The search yielded a total of 1 530 results. A duplicate detection process was performed in  
277 two phases. Firstly, the detection was supported by Mendeley's software tool to check  
278 duplicates. Based on a reported accuracy of over 95%, 250 duplicates were removed. Finally,

279 135 possible duplicates were manually examined, finding that eight results were not  
280 duplicated; therefore, an additional 127 duplicates were removed.

281 1 153 results were imported on Rayyan for the title and abstract screening, of which 32  
282 studies were selected for a full-text review, applying the full inclusion and exclusion criteria.  
283 15 studies were excluded due to the lack of description of mental health services (48–62),  
284 two because of their focus on characterising mental health disorders (63,64), two were only  
285 recommendations and were not implemented (65,66), and 1 due to the type of publication  
286 (67). In the end, 12 studies were selected for data extraction. The screening and selection  
287 process is presented using the PRISMA flow diagram (Fig 1) (68).

288 **Figure 1 - PRISMA – Study selection process**

289

## 290 **General features of included papers**

291 The studies were published in the last six years. Of the 12 selected studies, five were focused  
292 on substance use disorders, specifically heroin and alcohol consumption (69–73); three  
293 addressed mental health disorders such as anxiety, depression, PTSD, schizophrenia, and  
294 bipolar affective disorder (74–76); and the others were centred on suicide (77), behavioural  
295 health disorders (78,79), and inclusion and rehabilitation (80).

296 Geographically, there was high variability since only four studies were solely conducted in  
297 the principal cities of Bogota or Cali, while the rest were in multiple smaller cities and  
298 municipalities in the country, mainly in rural areas. Notably, three studies were multicentric,  
299 combining both urban and rural settings. Similarly, the most reported geographic level  
300 attention was local, which means that service is delivered by smaller settings focused on

301 specific districts or neighbourhoods, different to regional and national levels that cover  
302 wider populations (7).

303 Ten studies reported the complexity level of the healthcare institutions, of which seven  
304 provided healthcare at the low and middle levels. Likewise, it was significant that all the  
305 studies involved multidisciplinary HCPs. Mainly, general practitioners, psychiatrists,  
306 psychologists, nurses, and social workers participated. Nevertheless, five studies included  
307 infrequent providers such as physical education instructors, nutritionists, occupational  
308 therapists, schoolteachers, and even internally displaced women who were trained as part of  
309 a program. Four studies were classified as complementary/alternative treatments, four as  
310 psychotherapy and four as medication programs along with outpatient or inpatient  
311 treatment.

312 Finally, about the target population, half of the studies were directed to the general  
313 population (adults or children), while the rest pursued only men, IDW, university students or  
314 users of psychoactive substances.

## 315 **Quality of evidence**

316 The studies' quality was assessed using the Mixed Methods Appraisal Tool (MMAT). This tool  
317 was selected because it is feasible to evaluate mixed studies reviews (81).

318 Overall, the studies had a quality performance of 3.6 over 5.0 on average, with the lowest  
319 and highest quality scores of 2.5 and 5.0, respectively. Seven of 12 studies scored above 4.0,  
320 and none below 2.5. Notably, lowest scores revealed issues with sampling strategy and  
321 coherence between data, methods, and discussion. Also, half of the selection were



322 quantitative descriptive studies, while the other half were qualitative. Further information is  
323 provided in **S2 Appendix 2. MMAT scores.**

324

## 325 **Findings**

326 We report on our findings using the broad structure of the CFIR (constructs and domains)  
327 complemented with the selected factors of the Socio-Political Economy of Global Mental  
328 Health framework.

329

### 330 **1. Intervention's characteristics**

#### 331 *Intervention source*

332 Mental health interventions were developed and implemented via partnerships between  
333 universities, healthcare providers, and government bodies. Studies also involved  
334 international research institutions from North America (Canada and The United States)  
335 (17,74,82,83).

#### 336 *Evidence strength & quality*

337 Studies were supported by primary systematic reviews, national public surveys like the  
338 National Mental Health Survey in 2015 (83,84) and previous international studies with  
339 notable performance results in similar settings (82,85,86).

#### 340 *Relative advantage*

341 All the reviewed alternative interventions showed significant advantages in comparison to  
342 standard treatment options. One intervention reduced access barriers like geographical  
343 isolation (84), treatment continuity, and HCP and patient satisfaction. Another positive point  
344 was the approval from settings administrators and will to support implementation,  
345 evaluation and continuity (71,75,80). Nevertheless, the reported disadvantages were low  
346 articulation with pre-existing service models and no existence of infrastructure and skilled  
347 staff (83,87,88).

#### 348 *Design quality & packing*

349 Half of the selection did not report any toolkit, online or onsite materials for the  
350 intervention. The most common resources included prearranged support material from the  
351 international sponsor organisation (82,83) and audio-visual materials and software for  
352 monitoring and evaluation (84,89).

#### 353 *Cost*

354 It was remarkable that only two studies referred to financing sources in the interventions  
355 being evaluated. The study from Satizabal-Reyes and Ortiz-Quiroga (2020) (80) clarified that  
356 no public funding was involved in the program and its continuity merely relies on the urgent  
357 and accurate implementation of the National Mental Health Policy. By contrast, in the study  
358 by González et al., (73) 43% of the patients paid for their treatment and were treated by  
359 private providers, while the remaining patients were covered by the healthcare system and  
360 attended public facilities.

361

## 362        **2. Outer setting**

### 363        *Patient needs & resources*

364        Primarily, the interventions were developed considering patients' thoughts and points of  
365        view. Also, patients' families were both formally and informally consulted. This helped  
366        managers understand the population's needs and patients to consider themselves as a  
367        person and not be labelled as a disease or condition. This was verified using evaluation  
368        components, informal chats and semi-structured interviews (87,91).

### 369        *External policies & incentives*

370        It was notable how the interventions were considered and tailored to the Colombian mental  
371        health system. All of them mentioned the 2013 National Mental Health Policy and similar  
372        regulations and are aimed to support their application.

373        Moreover, healthcare facilities had to comply with the national regulation to maintain the  
374        services enabled or receive high standards certification, thus sustaining public and private  
375        funding (17,83,84,87).

376

## 377        **3. Inner setting**

### 378        *Structural Characteristics*

379        There was a unanimous position favouring better coordination with government bodies,  
380        healthcare providers and research institutions. Additionally, HCPs' training opportunities and  
381        workload imbalance were aspects in need of improvement.

382 For instance, the lack of skilled HCPs and the excessive workload for professionals were  
383 constantly mentioned. For example, nurses were reported to work more than four times the  
384 shift time per week compared to psychiatrists (85,92).

#### 385 *Implementation climate and tension for change*

386 HCPs welcomed technology-based strategies, but there was some resistance and a need to  
387 redefine roles when adapting to new healthcare delivery models (e.g., primary healthcare  
388 versus traditional clinical treatment) (17,83,84).

389 In addition, community-based interventions and programs led by universities or research  
390 institutions were more likely to have a favourable implementation climate (87,93).

391 The studies on opioid use disorders indicated a social opposition to any initiative associated  
392 with psychoactive substances. The Colombian armed conflict association with narcotraffic  
393 caused a social belief of Colombia being a producer country and not a consumer one.  
394 Therefore, it is necessary to increase the collaboration between insurers, providers,  
395 researchers, policymakers, police bodies and law entities such as The Ministry of Justice.  
396 Hence, Colombia will address the emerging consumption phenomenon and its consequences  
397 (85,88).

#### 398 *Available Resources*

399 Not all the studies reported the accessibility of resources for implementation and  
400 replication. The access to resources varied considering the type of institution and the  
401 established agreements with healthcare administrator companies. The better the  
402 cooperation was, the sooner secure the resources were secured, and the more  
403 straightforward implementation was (17,82,88,92).

404 *Access to Knowledge & Information*

405 The reported programs required diverse types of training. The training varied depending on  
406 whether the setting was urban or rural. While urban centres had more training and  
407 development chances, rural ones struggled with adequate training resources due to  
408 deficient internet infrastructure. Alternatively, the strategy from Ceballos et al., (2016)  
409 trained non-HCPs people who were also affected by the problem to be addressed. This  
410 intervention was closely supervised and approved by remote and onsite experienced  
411 trainers.

412 The interventions sponsored by international institutions demonstrated more precise and  
413 constant training and followed up (17,82,83,86).

414

415 **4. Process**

416 *Planning*

417 Generally, the interventions had approved protocols, guidelines and plans that described  
418 phases, strategies, and activities. This eased implementation, prevented avoidable barriers  
419 and emphasised the importance of the programs.

420 *Engaging*

421 Only a few studies stated that outside actors backed them. Supporters included police  
422 forces, students, and official health officers (77,85,91,93).

423 *Executing*

424 Despite the existence of plans and protocols, some implementation difficulties were  
425 mentioned. The difference in nature and financing source between public and private  
426 institutions was a problem when executing the interventions. Public institutions were more  
427 likely to be involved than private ones because the public felt more responsible for the  
428 health status of their community (17). Nevertheless, public centres presented more access  
429 barriers and less retention of patients.

430 Consulted HCPs reported that time was a frequent problem during execution because the  
431 time consumed during piloting, implementation and evaluation was not considered in their  
432 workload. Both situations could be certainly addressed with better management practices  
433 (83,88). Nonetheless, half of the selection stated that implementation was conducted as  
434 planned with minor anticipated obstacles, such as technical and logistical difficulties.

#### 435 *Reflecting & Evaluating*

436 Although implementation challenges were reported, most of the selected studies reported  
437 positive results that were confirmed after assessment procedures. Two interventions  
438 developed their evaluation forms (84,93), whereas others utilised established tools  
439 commonly used worldwide (17,82,86,88). Information collected on these instruments was  
440 individual, assessed performance, and compared indicators against pre-existing programs  
441 before and after completion.

442 On the other hand, two studies did not report assessments because of the nature of the  
443 studies, which mainly focused on show characteristics, advantages and development rather  
444 than their evaluations (77,87). Only one study reported that an impact evaluation would be  
445 performed in the future considering the long-term design of the intervention, which was  
446 focused on preventing violence in children and young people using a positive promotion

447 approach (91). Hernández Holguín et al., (78) followed this approach based on the public  
448 health ecological model to implement strategies in different spheres such as family, school,  
449 and neighbourhood, where children and parents were supported in topics such as nutrition,  
450 routines, and crying.

451 Methodologically, quantitative studies supported their results through descriptive statistics,  
452 characterising patients, and explaining programs' characteristics and treatment models,  
453 among other variables (17,82,84,85,88,92). Alternatively, qualitative studies reported  
454 participants' viewpoints, inviting them to provide their perspectives about the programs'  
455 performance and feedback (83,94,95).

456

## 457 **5. Socio-political economy in mental health**

### 458 *Gender and Sexuality*

459 Overall, interventions mentioned words such as "female or male" only for descriptive  
460 statistical purposes. There was no mention of gender, LGBT (Lesbian, Gay, Bisexual, and  
461 Transgender), hetero or homosexual, or other related terms.

462 One study highlighted that women and their children affected by conflict were often forced  
463 to displace to suburban locations where they faced socioeconomic hardship and stigma.  
464 Considering this situation, the intervention was focused on women, because improvement in  
465 their mental health could impact the mental and physical health and functioning of the  
466 household (74).

467 Another study reflected on reviewing the gender perspective in terms of parenthood,  
468 contemplating differences in caregiving according to child sex. This perspective aimed to

469 shape more suitable strategies for preventing violence and promoting positive development  
470 for children and young people considering gender roles (78)

471 *Racism, Caste & Xenophobia*

472 Associated terms such as race, racial, ethnicity, or xenophobia were not mentioned in the  
473 selected literature. Only one study acknowledged culture and nationality as an influence on  
474 the intervention's performance. Shannon et al., (71) stressed how interventions and  
475 educational material need to be culturally appropriate and deem social influences that tend  
476 to lead to exclusion or practices based on preferences. All this increases responsiveness and  
477 involvement, impacting positively mental health outcomes.

478

479 *Age & Disability*

480 One study mentioned older adults in their analysis, exploring the main reason suicide in this  
481 group was related to structural social and economic conditions within specific historical  
482 periods. This study suggested that enhancing the social and institutional response to these  
483 conditions might impact positively mental health factors that go beyond the psychologist  
484 and psychiatrist's scope (77).

485 Three studies mentioned how mental health illness was a factor in disability, and  
486 deteriorating quality of life in both the individual and their family and community (70,71,80).

487 Substance abuse was a major issue in increasing mortality and contributing to the rising of  
488 years lived with a disability (YDL) and Disability Adjusted Life Years (DALYs) (96)

489



## 490 **Discussion**

491 This review identified the mental health services in Colombia assessed in studies and  
492 published in peer-reviewed journals. It provided background information about the history  
493 of mental health services and the healthcare system, and it explained how this has shaped  
494 modern models of service provision. Finally, it has assessed implementation processes using  
495 a modified CFIR with the Socio-Political Economy of Global Mental Health framework by  
496 Burgess et al., (43) to make it more sensitive to wider social and political factors known to  
497 shape the Colombian context.

498

### 499 **Identified mental health services**

500 The first objective of this review sought to determine the mental health services established  
501 in Colombia as reported in peer-reviewed literature. Reported interventions offered a broad  
502 overview of how mental health has been considered and changed in the last years.

503 The compiled information showed that the studies focused on certain common and severe  
504 mental health conditions such as substance abuse, anxiety, and schizophrenia. Only one  
505 study was focused on inclusion and rehabilitation strategies. The types of interventions were  
506 psychotherapy, medication programs and complementary treatments. The target population  
507 was diverse, with a high majority focusing on general adults and children and specific groups  
508 such as users of psychoactive substances and armed conflict victims. Furthermore, studies  
509 were broadly completed in some small municipalities and towns where sometimes even  
510 essential healthcare services like general practitioners or laboratory services are unavailable.

## 511 **Community mental health**

512 Prior studies have noted the importance of rethinking mental health services and treatments  
513 within a more coordinated mental health system. This system ought to act concertedly with  
514 reasonable opportunities for all the population, but with different approaches to special  
515 populations such as armed-conflict victims, women, and LGBTQ+ groups, among  
516 others(74,77,79,80).

517 A tendency for more community mental health involvement was observed in the results. As  
518 other authors and health agencies have suggested, a community-centred mental health  
519 approach promotes equity and increases access to community resources and patient  
520 satisfaction (97,98). Studies from this review align with worldwide evidence and positive  
521 experiences of holistic approaches and social recovery rather than biomedical models and  
522 clinical recovery (99,100). These studies also recommend disseminating this approach and  
523 strengthening existing community mental health services (69,70,80,101). Ultimately, it is  
524 recommended to continuously assess implementation as a whole process and complement  
525 it with impact evaluation. As previously emphasised by other authors, impact evaluation is  
526 vital for global mental health. Measuring factors such as access, coverage, costs, and quality  
527 facilitate influencing policymakers to prioritise mental health interventions and strengthen  
528 the relevance of mental health interventions (102)

529

## 530 **Challenging psychiatry hegemony**

531 Seven studies were conducted in healthcare settings of low and medium levels of  
532 complexity, possibly not requiring an inpatient regimen and including multiple HCPs.

533 Surprisingly, all the interventions included multidisciplinary teams during implementation,  
534 contrasting with the traditional psychiatry hegemony.

535 Historically, in Colombia, mental health services were primarily focused on clinical  
536 understandings of mental health, thus contributing to the medicalisation of human life (60),  
537 which promotes the excessive medical control of non-medical affairs and the overlooking of  
538 social factors instigating disease.

539 Not instituting mental health services in psychiatric discourses was a relevant tendency  
540 identified in this review. The use of multidisciplinary professionals gives different  
541 perspectives on mental health and expected mental health outcomes and prevents the  
542 repetition of harmful medical treatment overuse such as incarceration, electroconvulsive  
543 therapy, and lobotomy (103). This finding is consistent with previous works about the need  
544 to reject hegemonic processes in global mental health, preventing the re-colonisation of  
545 mental health (104,105), and replacing the mental health practice with strategies that do not  
546 follow pathologisation and pharmaceuticalisation processes. Previous works in Brazil have  
547 associated these processes with a public health crisis, such as the uncontrolled use of  
548 psychotropics in vulnerable settings where social and economic factors are relevant but not  
549 deemed (106).

550 In addition, and following this trend, services were active in considering the need of users,  
551 families, and other stakeholders. These diverse perspectives mainly were welcomed by  
552 managers because they offered more quality and order. Organisations and providers were  
553 open to hearing patients' concerns and building together treatment options. This attitude is  
554 consistent with multiple recommendations for mental health services to follow the recovery  
555 approach, empowering patients to participate in their treatments actively (107),

556 understanding that services might differ for specific groups (108) and considering the SDMH  
557 comprehensively(100).

558

## 559 **Implementation of mental health services**

560 Services were characterised by being evidence-based, guided by the 2015 National Mental  
561 Health Survey and previous clinical studies. This approach strengthened the potential  
562 advantage and success of comparing it with standard services.

563 Studies rarely reported costs associated with implementation. This could be explained due  
564 to the financing nature of the reported services (most of them funded by non-public or  
565 governmental sources), so the budget may not be open-source information. Nevertheless,  
566 this information may be found in other sources like budget reports that were out of the  
567 scope of this review.

568 Though positive, this determination should be interpreted with caution because it may be  
569 motivated by funding attraction or certification and enablement process instead of genuine  
570 interest in changing the delivery model. Nevertheless, with proper regulation and  
571 supervision, this is a remarkable advancement in mental health services centred on people's  
572 needs.

573 Another important finding was the level of international cooperation as a support  
574 mechanism. For many years, overseas institutions have advocated mental health initiatives  
575 in Colombia during all their phases (69,71,74). While some institutions backed services with  
576 mentoring and training, others provided grants and research scholarships. Governmental

577 support is relatively limited to allow data access and use of infrastructure instead of  
578 economic funding (76,80).

579 Some internal characteristics within organisations facilitated implementation. HCPs, staff,  
580 and users embraced the use of technology for service delivery. This facilitated the  
581 implementation of telemedicine services, also called telemental health (109), which  
582 prevented geographical barriers to access without jeopardising the quality and relationship  
583 between users and HCPs. Different Colombian experiences have shown the advantage of  
584 promoting these services to address mental health disorders.

585 Sánchez Díaz et al., (66) highlighted the practicality of telemental health, in particular phone  
586 calls to follow-up patients where mental health professionals are not available, while Torrey  
587 et al., (110) underlined that the use of telematic tools for screening increased the number of  
588 early diagnoses of depression in primary care services where it might be easier to address.

589 Although telemental health is a strong tendency with multiple advantages for providers,  
590 users, and HCP, it should not be used as a replacement strategy for face-to-face services but  
591 as a complementary strategy. If necessary, patient needs ought to be reviewed and  
592 addressed accordingly with specialised services. Virtual interactions should be used in  
593 individual situations where it might be beneficial in comparison (e.g., group interventions,  
594 patients with physical disabilities or geographical difficulties in accessing services) (111).

595 It is notable that even when telematic services are thought to enhance mental health  
596 services coverage, they might have their own access' barriers when patients lack  
597 technological access and expertise (111). They could also be unsuccessfully implemented  
598 due to clinicians' and managers' lack of trust in efficacy, integration into mental health  
599 systems and missed in-person experience (112). Nevertheless, multiple experiences in both

600 HICs and LMICs have underlined how telemental health services might be time and cost-  
601 saving and offer flexibility to both patients and clinicians (e.g., no travel hours, fewer missed  
602 appointments), which could increase access and coverage, leading to address inequalities in  
603 mental health services (113–116).

604 Resistance to adoption was less when recognised institutions like universities guided the use  
605 of technology. Community-based interventions function better when students are involved,  
606 particularly students from different disciplines because students facilitate adoption (80). This  
607 also accords with other experiences of mental health services implementation in Latin  
608 America, where students are highly recognised also by staff and other HCPs (117). Though  
609 they are not external actors because they are involved during the entire process within the  
610 organisation, it can be said that they champion the process and bridge providers with users  
611 positively.

612 In contrast, implementation was usually disrupted because of the lack of coordination  
613 between healthcare actors. Though some authors believe that better management could  
614 address this problem, it might require redirecting government bodies' role in planning,  
615 delivery, and regulation.

616 One example of this was the study by Barrios-Acosta et al., (77) about the institutional  
617 response of universities to suicide in students, which was utterly unconnected to  
618 government services. Nevertheless, the reported services constantly contemplate national  
619 roadmaps and guidelines as crucial references, and they follow them strictly.

620 In this case, institutions designed their strategies to address suicide, considering national  
621 and local regulations but lacking cooperation and communication with external actors. This  
622 caused, as in other mental health services, overlapped efforts and reduced efficacy. It is,

623 therefore, usual that services aim to suit the health policy instead of proposing different  
624 structural approaches from their planning. This finding was also reported by Aceituno et al.,  
625 (118) concerning poor coordination and time constraints as factors that impacted the  
626 implementation of early psychosis services in Chile.

627 As in other types of health care, there is still a disparity in workload. There was a  
628 considerable difference in shift times between nurses and psychiatrists. Gomez Restrepo et  
629 al., (70) associated this difference with not specified costs since hiring psychiatrists for  
630 extended periods represents elevated expenses. Unfortunately, this imbalance may create  
631 an avoidable hostile labour environment. Likewise, training and execution times were  
632 sometimes not considered in the staff workload, creating a reluctance to participate.  
633 Although there was no specific information about the relationship between staff salaries and  
634 inadequate performance in selected studies, multiple global studies in the last 30 years have  
635 highlighted this as a critical issue in implementation (119,120).

636 Services generally had good planning strategies, such as preliminary agreed plans on which  
637 responsibilities and deadlines were clear. Planning facilitated implementation by preventing  
638 easily avoidable problems.

639 Precise design and assembling promote accessibility for users, facilitating adaptation and  
640 future implementation (121). However, regarding how the interventions were designed and  
641 presented, many did not report toolkits or material used to support implementation.  
642 Therefore, it is suggested to highlight the usage of this material since it is also a key step in  
643 promoting the dissemination and introducing innovative interventions in new settings (122).

644 During implementation, the difference between public and private institutions was more  
645 evident. It may be related to sources' availability or nature, but private institutions tended

646 only to have slight difficulties. This trend contradicts previous studies in low- and high-  
647 income economies (Nepal and Australia), where settings were also influenced by private  
648 organisations but shifted to mixed partnerships and independent public-funded services in  
649 the last years (123,124).

650 Australian experience suggested prioritising the allocation of public funding to public mental  
651 health services rather than private ones because this support can result in better-positioned  
652 and strengthened mental health systems (123). In contrast, the Nepal case proposed  
653 improving public and private partnerships, including a comprehensive model where diverse  
654 partners are involved. Both Nepal and Colombian cases were generally in low-resource  
655 settings and were consistent with the limited inclusion of other partners different to the  
656 usual overseas institutions and public settings.

657 Unlike Colombia, the Nepal study recommended the participation of non-governmental  
658 organisations, healthcare service users, multicultural professionals and academic medical  
659 centres (124). These examples are feasible options and are in line with previous global  
660 guidelines to develop infrastructure for mental health financing, where elements such as  
661 involvement of stakeholders, better information systems and evaluation analysis (125).

662 Finally, regarding evaluation processes, these were performed using designed evaluation  
663 forms and validated instruments. This strategy allowed institutions to identify weaknesses,  
664 improvement opportunities and future approaches to secure implementation achievement.

665 Unlike other Latin American settings, where the evaluation was utterly requested to  
666 participants and non-participants (70), most of the studies in Colombia did not request  
667 feedback from all actors (patients, administrative staff, or providers) but just from patients.



668 This situation can lead to incomplete quality improvement plans and inadequate reflection  
669 of organisational priorities (126).

670

## 671 **Socio-Political interactions in mental health**

672 Overall, selected studies were ambiguous in considering the influence of gender, race, and  
673 age, in undermining people's mental health.

674 Regarding gender and sexuality, the studies limited the use of related terms for statistical  
675 purposes. Only 3 studies reported reflections regarding the influence of gender on mental  
676 health (71,74,78). For example, Shannon et al., (71) identified that patients and providers  
677 were conscious of the gender differences in depression and treatment seeking. In fact,  
678 women were more often willing to know more about symptoms and seek out support for  
679 depression, while men were more reluctant in accepting symptoms, diagnosis, and  
680 treatment due to the "*machismo*" culture (71).

681 Previous experiences in Latin America have unveiled the relevance of gender perspectives in  
682 mental health models and the particular influence of the "*machismo*" and the less-known  
683 "*marianismo*" on it. Marianismo is the influence of catholic beliefs in Latin women, mainly  
684 related to the importance of the Virgin Mary paradigm, normalising women in their  
685 submissive feminine role based on their greater moral and spiritual strength (127)

686 In lived experiences and peer-reviewed studies (128–130), both gender role expectations  
687 have been associated with detrimental emotional health outcomes (depression and anxiety  
688 symptoms, or violent and hostile behaviours) that are also linked to socio-demographic  
689 factors, mentioned before (e.g., race, age, nationality). In addition, the effects of these

690 expectations are particularly worse in LGBTQ+ people due to homophobia, racism and  
691 fetishization (129)

692 Second, though discrimination and stigma based on race and ethnicity are two key risk  
693 factors for mental illness (43), none of the studies referred to this, only one work underlined  
694 the importance of adapting material and educational strategies based on factors such as  
695 ethnicity and cultural viewpoints. Multiple works have enunciated race and ethnicity as  
696 social determinants that preferentially disadvantage certain groups in numerous social  
697 matters, such as healthcare, marginalising them and affecting their well-being (131–133).

698 Finally, although age is an influence that might lead to discrimination or stereotyping  
699 selected (43), studies did not consider it a relevant factor for their interventions. Only  
700 Barrios-Acosta et al., (77) highlighted how suicide in older adults is frequently associated  
701 with structural conditions, but this is not deepened in the study, which is focused on young  
702 university students.

703 In line with Flores et al., (134) and Giebel et al., (135) there is scarce literature on older  
704 people and mental health in Colombia and only a few studies have explored this field. For  
705 instance, Flores et al., (134) used quantitative data which associated higher levels of  
706 depression in older adults with earlier armed-conflict situations such as sexual abuse and  
707 displacement. However, as in our selected studies, these work and previous ones have failed  
708 in incorporating qualitative experiences of life events on peoples' mental health, which  
709 might broaden and analysis and debate regarding mental health services and policies.

710 Regarding disabilities, only Taborda-Zapata et al., (75) commented on how the answer of the  
711 traditional mental health model has been towards hospitalization, prolonging

712 hospitalizations that have led to direct access to institutionalization, thus prolonging  
713 disability.

714 In general, the selected studies did not grapple with the relevance of the selected constructs  
715 in mental health. The inclusion of gender, race or age/disability perspectives in mental  
716 health discussions in Colombia is still unsettled. As previous studies have endorsed (136), it is  
717 suggested for future mental health research to string together socioeconomic factors that  
718 shape mental health and well-being and not limit the discussion towards institutional  
719 performance based exclusively on indicators. It is necessary to explore expanded viewpoints  
720 in people from LMICs, who face certain social and political circumstances. This  
721 comprehensive understanding might lead us to recognize the wider impact of these factors  
722 on the country's goals of achieving healthy relationships and well-being.

723

## 724 **The evident but missing association with armed conflict**

725 Lastly, although Colombia has been one of the most affected countries by long-term armed  
726 conflicts for the last decades, the included studies were vague on linking conflict and mental  
727 health. 11 studies did not mention this major factor, while 1 merely mentioned it only in the  
728 background section (74)

729 Earlier works have stressed the influence of conflict-related violence on people's mental  
730 health. Chaskel et al., (137) described how armed insurgency and internal displacement lead  
731 to increased substance misuse, disability, and suicide. Also, Cuartas Ricaurte et al., (138)  
732 analysed the relationship between exposure to the armed-conflict and violence with mental  
733 health disorders in Colombia concluding that exposure to violent crimes multiplied

734 substantially by socioeconomic difficulties and the overall risk of mental health disorders.  
735 This relationship is in line with previous studies in Colombia that also linked violence with  
736 socioeconomic deprivation in terms of unemployment and poverty, and together with lack  
737 of assistance from the government lead to mental health disorders (139).

738

## 739 **Strengths and limitations**

740 The results from this review may be used for the public debate about the nature of mental  
741 health systems and services in Colombia and how they are accomplishing or failing to  
742 people's mental health. To our knowledge, it is the only compilation of this information,  
743 including positive changes and the efforts to include the SDMH in policies, systems, and  
744 services in Colombia.

745 To guarantee the consistency and transparency of this systematic review, we followed the  
746 PRISMA guidelines for reporting and applied the MMAT to assess the quality of the included  
747 studies. However, one limitation was that data review and extraction had no second  
748 reviewer to discuss conflicts and reduce bias.

749 The main limitation of this study was the paucity of detailed publications depicting the  
750 implementation of mental health services. Despite applying a comprehensive search strategy  
751 covering all the databases deemed relevant, only twelve papers were found to describe a  
752 mental health service or intervention implementation. An added related factor is that these  
753 services are possibly explained in grey literature from governmental or non-governmental  
754 sources. Therefore, not having included government documents and policies or grey

755 literature reduced the generalisability of assumptions about the availability of these services  
756 in the country.

757

## 758 **Conclusion**

759 This review has reflected on mental health services in Colombia and their implementation  
760 barriers and facilitators. Even though data revealed that mental health services involved  
761 strong multidisciplinary teams and extensively adopted the idea of considering users,  
762 communities and stakeholders' viewpoints, there is a notable gap between mental health  
763 planning and the implementation of services. There is also an evident disregard for social  
764 and economic factors such as gender, race, age, and the influence of the long-run conflict in  
765 Colombia. Selected studies were distant from these concepts and historical events, and their  
766 impact on mental health, mostly only mentioning them to segregate reported results or  
767 provide background.

768 Remarkably, Colombia has started a long-term public health plan to comprehensively  
769 address mental health through laws, policies, and strategies. The aim of this plan is to  
770 promote mental health in protective environments, prioritising integral treatments and  
771 enhancing intersectoral order and integration (140). However, a critical reported barrier has  
772 been the lack of coordination between insurers (EPS), providers, and policymakers with  
773 negative consequences on implementation and access to quality care. To redress these  
774 challenges, it is necessary to restructure governments' responsibility within the mental  
775 health system, avoid overregulation, and give people and communities more voice and  
776 control over their lives and health, as evidence has recommended (97)

777 Findings suggested the potential of implementing modern models in mental health services  
778 in Colombia, involving strategies based on communities, users' perspectives, and  
779 emancipation from the biomedical model. Nevertheless, further efforts are needed to adapt  
780 these elements to achieve culturally responsive mental health services with expanded access  
781 and increased quality. Moreover, it is necessary to continue exploring complex processes  
782 such as mental health services, studying their implementation factors, and involving cost  
783 information to achieve substantial evidence. Finally, as underlined throughout, it is advisable  
784 to persist in adopting community-based mental health services, and the recovery approach  
785 and contemplate gender, race and age as influences that affect mental health. In doing so,  
786 these may build healthier, more organised, and empowered individuals and communities.

787

788

789

790

791

792

793

794

795

796

797

798

799

800

801

802

## 803 **References**

- 804 1. Bullock HL, Lavis JN. Understanding the supports needed for policy implementation: a  
805 comparative analysis of the placement of intermediaries across three mental health systems.  
806 Health Res Policy Syst. 2019 Dec 22;17(1):82.
- 807 2. Patel V, Saxena S, Lund C, Thornicroft G, Baingana F, Bolton P, et al. The Lancet Commission  
808 on global mental health and sustainable development. The Lancet. 2018 Oct  
809 27;392(10157):1553–98.
- 810 3. United Nations Development Programme (UNDP). Sustainable Development Goals [Internet].  
811 Sustainable Development Goals. 2015 [cited 2021 Dec 23]. Available from:  
812 <https://www.undp.org/sustainable-development-goals>
- 813 4. World Health Organization. Mental health action plan 2013 - 2020. Mental health action plan  
814 2013 - 2020. Geneva; 2013 Jan.
- 815 5. Pan-American Health Organization (PAHO), World Health Organization (WHO). The Caracas  
816 Declaration [Internet]. Conference on the Restructuring of Psychiatric Care in Latin America  
817 within the Local Health Systems. 1990 [cited 2021 Dec 23]. Available from:  
818 <https://www.globalhealthrights.org/instrument/caracas-declaration/>
- 819 6. Cosgrove L, Mills C, Amsterdam J, Heath I, Mehta A, Kalathil J, et al. Global mental health. The  
820 Lancet. 2019 Jul 13;394(10193):117–8.
- 821 7. Cooper S. Global mental health and its critics: moving beyond the impasse. Crit Public Health.  
822 2016 Aug 7;26(4):355–8.
- 823 8. Mills C. Decolonizing global mental health: The psychiatrization of the majority world. 1st ed.  
824 Decolonizing Global Mental Health: The Psychiatrization of the Majority World. London:  
825 Routledge; 2014. 1–175 p.
- 826 9. Revet A, Montastruc F, Roussin A, Raynaud JP, Lapeyre-Mestre M, Nguyen TTH.  
827 Antidepressants and movement disorders: A postmarketing study in the world  
828 pharmacovigilance database. BMC Psychiatry. 2020 Jun 16;20(1):1–13.
- 829 10. Rajkumar R, Melvin G. Pharmacovigilance for psychiatrists: An introduction. Indian J  
830 Psychiatry. 2014;56(2):176.

- 831 11. Alarcón RD. Mental health and mental health care in Latin America. *World Psychiatry*. 2003  
832 Feb;2(1):54.
- 833 12. Rojas-Bernal LÁ, Castaño-Pérez GA, Restrepo-Bernal DP. Salud mental en Colombia. Un  
834 análisis crítico. *Ces Medicina*. 2018;32(2):129–40.
- 835 13. Kohn R, Ali AA, Puac-Polanco V, Figueroa C, López-Soto V, Morgan K, et al. Mental health in  
836 the Americas: an overview of the treatment gap TT - La salud mental en las Américas: una  
837 visión general de la brecha de tratamiento TT - Saúde mental nas Américas: uma visão geral  
838 da lacuna de tratamento. *Revista Panamericana de Salud Pública*. 2018;42.
- 839 14. Instituto Nacional de Salud, Observatorio Nacional de Salud. Consecuencias del Conflicto  
840 Armado en Salud en Colombia. Bogotá; 2017.
- 841 15. Chaskel R, Shultz JM, Gaviria SL, Taborda E, Vanegas R, García NM, et al. Mental health law in  
842 Colombia. *BJPsych Int*. 2015;12(4):92–4.
- 843 16. República de Colombia. Ley 100 de 1993, por la cual se crea el sistema de seguridad social  
844 integral. Bogotá: El Congreso de la Republica de Colombia; Dec 23, 1993.
- 845 17. Castro SM, Cubillos L, Uribe-Restrepo JM, Suárez-Obando F, Meier A, Naslund JA, et al.  
846 Assessing the Integration of Behavioral Health Services in Primary Care in Colombia. *Adm  
847 Policy Ment Health*. 2020 May 13;47(3):435–42.
- 848 18. Yepes Lujan JF. Colombia: A Healthcare System in Crisis. *Medical Solutions*. 2012;Essay Seri.
- 849 19. Romero-González M, González G, Rosenheck RA. Mental health service delivery following  
850 health system reform in Colombia. *Journal of Mental Health Policy and Economics*. 2003  
851 Dec;6(4):189–94.
- 852 20. Congreso de la República de Colombia. Ley 1616 de 2013 por medio de la cual se expide la ley  
853 de Salud Mental y se dictan otras disposiciones. Congreso de la República de Colombia; 2013.
- 854 21. Ministerio de Salud y Protección Social de Colombia. Resolución 0004886 de 2018 por la cual  
855 se adopta la Política Nacional de Salud Mental. 2018.
- 856 22. Holguín DMH, Sanmartín-Rueda CF. Paradox of mental health in Colombia: Between human  
857 rights, the predominance of the administrative and the stigma. *Revista Gerencia y Políticas de  
858 Salud*. 2018 Dec 11;17(35).
- 859 23. Holguín DMH, Sanmartín-Rueda CF. Paradox of mental health in Colombia: Between human  
860 rights, the predominance of the administrative and the stigma. *Revista Gerencia y Políticas de  
861 Salud [Internet]*. 2018 Dec 11 [cited 2021 Aug 24];17(35). Available from:  
862 <https://revistas.javeriana.edu.co/index.php/gerepolsal/article/view/24379>
- 863 24. Fink-Samnick E. The Social Determinants of Mental Health: Definitions, Distinctions, and  
864 Dimensions for Professional Case Management: Part 1. *Prof Case Manag*. 2021;26(3):121–37.
- 865 25. Campo-Arias A, Oviedo HC, Herazo E. Stigma: Barrier to access to mental health services.  
866 *Revista Colombiana de Psiquiatria*. 2014.
- 867 26. Campo-Arias A, Herazo E. Stigma and mental health in victims of Colombia’s internal armed  
868 conflict in situation of forced displacement . *Rev Colomb Psiquiatr [Internet]*. 2014;43(4):712–  
869 7. Available from: <https://www.scopus.com/inward/record.uri?eid=2-s2.0->



- 870 84937347074&doi=10.1016%2Fj.rcp.2014.09.004&partnerID=40&md5=e6a727b3241d2b8a1  
871 0a4cfffec92a743
- 872 27. Chaskel R, Gaviria SL, Espinel Z, Taborda E, Vanegas R, Shultz JM. Mental health in Colombia.  
873 *BJPsych Int*. 2015 Nov;12(4):95.
- 874 28. The Borgen Project. The Silent Truth About Mental Health in Colombia [Internet]. The Borgen  
875 Project. 2021 [cited 2022 Sep 23]. Available from: [https://borgenproject.org/silent-truth-  
876 about-mental-health-in-colombia/](https://borgenproject.org/silent-truth-about-mental-health-in-colombia/)
- 877 29. Palacio A. CA. Situación de salud mental en Colombia. *Int J Psychol Res (Medellin)*. 2018 Sep  
878 1;11(2):6–7.
- 879 30. Gonzalez-Diaz JM, Córdoba R, Zamora DC. Mental health in Colombia: Amid a global virus,  
880 tear gases and rifle shots. *The Lancet Regional Health - Americas*. 2021 Nov 1;3:100050.
- 881 31. Giebel C, Zuluaga MI, Saldarriaga G, White R, Reilly S, Montoya E, et al. Understanding post-  
882 conflict mental health needs and co-producing a community-based mental health  
883 intervention for older adults in Colombia: a research protocol. *BMC Health Serv Res*. 2022 Dec  
884 1;22(1):1–7.
- 885 32. PAHO/WHO. Shining a spotlight on mental health in rural communities in Colombia [Internet].  
886 *Bulletins*. 2018 [cited 2022 Sep 23]. Available from:  
887 [https://www3.paho.org/hq/index.php?option=com\\_content&view=article&id=14395:shining-  
888 a-spotlight-on-mental-health-in-rural-communities-in-  
889 colombia&Itemid=1001&lang=en#gsc.tab=0](https://www3.paho.org/hq/index.php?option=com_content&view=article&id=14395:shining-a-spotlight-on-mental-health-in-rural-communities-in-colombia&Itemid=1001&lang=en#gsc.tab=0)
- 890 33. BORGEM Magazine. The Future of Mental Health in Colombia [Internet]. *Global Health*. 2020  
891 [cited 2022 Sep 23]. Available from: [https://www.borgenmagazine.com/mental-health-in-  
892 colombia/](https://www.borgenmagazine.com/mental-health-in-colombia/)
- 893 34. Efron SE, Ravid R. *Writing the literature review: a practical guide*. New York: Guilford  
894 Publications; 2018.
- 895 35. Aveyard H. *Doing a literature review in health and social care: a practical guide*. Open  
896 University Press; 2018.
- 897 36. Bauer MS, Damschroder L, Hagedorn H, Smith J, Kilbourne AM. An introduction to  
898 implementation science for the non-specialist. *BMC Psychol*. 2015;3(1).
- 899 37. Eccles MP, Mittman BS. Welcome to Implementation Science. *Implementation Science* 2006  
900 1:1. 2006 Feb 22;1(1):1–3.
- 901 38. Bauer MS, Kirchner JA. Implementation science: What is it and why should I care? *Psychiatry*  
902 *Res*. 2020 Jan 1;283:112376.
- 903 39. Damschroder LJ, Aron DC, Keith RE, Kirsh SR, Alexander JA, Lowery JC. Fostering  
904 implementation of health services research findings into practice: A consolidated framework  
905 for advancing implementation science. *Implementation Science*. 2009 Aug 7;4(1):1–15.
- 906 40. English M, Nzinga J, Mbindyo P, Ayieko P, Irimu G, Mbaabu L. Explaining the effects of a  
907 multifaceted intervention to improve inpatient care in rural Kenyan hospitals - interpretation  
908 based on retrospective examination of data from participant observation, quantitative and  
909 qualitative studies. *Implementation Science*. 2011 Dec 2;6(1):124.

- 910 41. English M, Nzinga J, Mbindyo P, Ayieko P, Irimu G, Mbaabu L. Explaining the effects of a  
911 multifaceted intervention to improve inpatient care in rural Kenyan hospitals - interpretation  
912 based on retrospective examination of data from participant observation, quantitative and  
913 qualitative studies. *Implementation Science* [Internet]. 2011 Dec 2;6(1):124. Available from:  
914 <http://implementationscience.biomedcentral.com/articles/10.1186/1748-5908-6-124>
- 915 42. Burgess R, Chobhthaigh SN, Lee S, Pathare S, Lemmi V, Lund C. Scoping Review Protocol:  
916 Establishing a Socio-Political Economy of Global Mental Health. OSF; 2022.
- 917 43. Burgess R, Chobhthaigh SN, Lee S, Pathare S, Lemmi V, Lund C. Scoping Review Protocol:  
918 Establishing a Socio-Political Economy of Global Mental Health. [Internet]. OSF; 2022 [cited  
919 2022 Sep 16]. Available from: <https://osf.io/cgjqh>
- 920 44. Felter CI, Renwick D. Colombia's Civil Conflict | Council on Foreign Relations [Internet]. council  
921 on foreign relations. 2017 [cited 2021 Apr 5]. Available from:  
922 <https://www.cfr.org/backgrounder/colombias-civil-conflict>
- 923 45. Ouzzani M, Hammady H, Fedorowicz Z, Elmagarmid A. Rayyan—a web and mobile app for  
924 systematic reviews. *Systematic Reviews* 2016 5:1. 2016 Dec 5;5(1):1–10.
- 925 46. Prada-Ríos SI, Pérez-Castaño AM, Rivera-Triviño AF. Clasificación de instituciones prestadores  
926 de servicios de salud según el sistema de cuentas de la salud de la Organización para la  
927 Cooperación y el Desarrollo Económico: El caso de Colombia. *Revista Gerencia y Políticas de  
928 Salud*. 2017 Jan 1;16(32):51–65.
- 929 47. Popay J, Roberts H, Sowden A, Petticrew M, Arai L, Rodgers M, et al. Guidance on the conduct  
930 of narrative synthesis in systematic reviews: A product from the ESRC Methods Programme.  
931 2006.
- 932 48. Bohórquez Peñaranda A, Gómez Restrepo C, Oviedo Lugo GF, de la Hoz Bradford AM, Castro  
933 Díaz SM, García Valencia J, et al. Modalidades de atención para el paciente adulto con  
934 diagnóstico de esquizofrenia en fase aguda y de mantenimiento. *Rev Colomb Psiquiatr*  
935 [Internet]. 2014;44:101–9. Available from:  
936 <https://linkinghub.elsevier.com/retrieve/pii/S0034745015000748>
- 937 49. Campo-Arias A, Oviedo HC, Herazo E. [Stigma: Barrier to Access to Mental Health Services].  
938 *Rev Colomb Psiquiatr*. 2014;43(3):162–7.
- 939 50. Zaraza-Morales DR, Hernández-Holguín DM. Towards a community mental health care for  
940 people with schizophrenia in Colombia. *Cien Saude Colet* [Internet]. 2016 Aug;21(8):2607–18.  
941 Available from: [http://www.scielo.br/scielo.php?script=sci\\_arttext&pid=S1413-  
942 81232016000802607&lng=es&tlng=es](http://www.scielo.br/scielo.php?script=sci_arttext&pid=S1413-81232016000802607&lng=es&tlng=es)
- 943 51. Jaramillo Estrada JC, Espinosa Duque D, Ocampo Lopera D, Arango García A, Arévalo Gutiérrez  
944 M, García González L, et al. Caracterización de la atención psicoterapéutica en la IPS CES  
945 Sabaneta, Colombia, 2014-2015. *CES Psicología* [Internet]. 2018;11(2):97–110. Available from:  
946 [https://www.scopus.com/inward/record.uri?eid=2-s2.0-  
947 85062722152&doi=10.21615%2Fcesp.11.2.9&partnerID=40&md5=985b7b9f0abcbe0c09e196  
948 d2e717a693](https://www.scopus.com/inward/record.uri?eid=2-s2.0-85062722152&doi=10.21615%2Fcesp.11.2.9&partnerID=40&md5=985b7b9f0abcbe0c09e196d2e717a693)
- 949 52. Gonzalez LM, Penaloza RE, Matallana MAMA, Gil FF, Gomez-Restrepo C, Landaeta APV, et al.  
950 [Determining Factors in the Access to Mental Health Services by the Adult Colombian  
951 Population]. Factores que determinan el acceso a servicios de salud mental de la población

- 952 adulta en Colombia [Internet]. 2016 Dec;45 Suppl 1:89–95. Available from:  
953 <http://ovidsp.ovid.com/ovidweb.cgi?T=JS&PAGE=reference&D=med13&NEWS=N&AN=27993>  
954 260
- 955 53. Medina M, Velásquez AV, Ribero OJ, Trujillo N. [Direct medical costs of suicide attempts by  
956 patients in Columbia’s Antioquia Mental Hospital Custos médicos diretos por tentativa de  
957 suicídio em pacientes do hospital de saúde mental de Antioquia, Colômbia]. *Rev Panam Salud*  
958 *Publica* [Internet]. 2018;42:e129. Available from:  
959 <http://iris.paho.org/xmlui/handle/123456789/49516>
- 960 54. Rojas-Bernal LÁ, Castaño-Pérez GA, Restrepo-Bernal DP. Salud mental en Colombia. Un  
961 análisis crítico. *Ces Medicina* [Internet]. 2018;32(2):129–40. Available from:  
962 [http://www.scielo.org.co/scielo.php?script=sci\\_arttext&pid=S0120-](http://www.scielo.org.co/scielo.php?script=sci_arttext&pid=S0120-)  
963 [87052018000200129&lang=es](http://www.scielo.org.co/scielo.php?script=sci_arttext&pid=S0120-87052018000200129&lang=es)
- 964 55. Villamizar VVA, Monsalve GIS, Lobo JHA, Manrique LC, Rodríguez GRL, de Biava YM, et al.  
965 Trends in psychological intervention and psychotherapy in Norte de Santander-Colombia.  
966 *Archivos Venezolanos de Farmacología y Terapeutica* [Internet]. 2018;38(5):546–51. Available  
967 from: <https://www.scopus.com/inward/record.uri?eid=2-s2.0->  
968 [85067846114&partnerID=40&md5=a9ad660d934f3111d21dbca833aef1b](https://www.scopus.com/inward/record.uri?eid=2-s2.0-85067846114&partnerID=40&md5=a9ad660d934f3111d21dbca833aef1b)
- 969 56. Borges G, Aguilar-Gaxiola S, Andrade L, Benjet C, Cia A, Kessler RC, et al. Twelve-month  
970 mental health service use in six countries of the Americas: A regional report from the World  
971 Mental Health Surveys. *Epidemiol Psychiatr Sci* [Internet]. 2019 Aug 27;29:e53. Available  
972 from:  
973 [https://www.cambridge.org/core/product/identifier/S2045796019000477/type/journal\\_](https://www.cambridge.org/core/product/identifier/S2045796019000477/type/journal_article)  
974 [artic](https://www.cambridge.org/core/product/identifier/S2045796019000477/type/journal_article)  
[le](https://www.cambridge.org/core/product/identifier/S2045796019000477/type/journal_article)
- 975 57. Marulanda FÁT, Arroyave CDL. Comprensión de la ciencia al servicio y cuidados de la salud y  
976 alteración mental. *Cien Saude Colet* [Internet]. 2019 Jan;24(1):275–84. Available from:  
977 [http://www.scielo.br/scielo.php?script=sci\\_arttext&pid=S1413-81232019000100275&tIng=es](http://www.scielo.br/scielo.php?script=sci_arttext&pid=S1413-81232019000100275&tIng=es)
- 978 58. Toro-Hernández ML, Mondragón-Barrera A, Múnera-Orozco S, Villa-Torres L, Camelo-Castillo  
979 W. Experiences with rehabilitation and impact on community participation among adults with  
980 physical disability in Colombia: perspectives from stakeholders using a community based  
981 research approach. *Int J Equity Health* [Internet]. 2019 Dec 3;18(1):18. Available from:  
982 <https://dx.doi.org/10.1186/s12939-019-0923-4>
- 983 59. Zamora-Rondón DC, Suárez-Acevedo D, Bernal-Acevedo O, Zamora-Rondon DC, Suarez-  
984 Acevedo D, Bernal-Acevedo O. [Analysis of needs and use of mental healthcare services in  
985 Colombia]. *Análisis de las necesidades y uso de servicios de atención en salud mental en*  
986 *Colombia* [Internet]. 2019;21(2):175–80. Available from:  
987 <http://ovidsp.ovid.com/ovidweb.cgi?T=JS&PAGE=reference&D=pmnm4&NEWS=N&AN=3302>  
988 [7326](http://ovidsp.ovid.com/ovidweb.cgi?T=JS&PAGE=reference&D=pmnm4&NEWS=N&AN=3302)
- 989 60. Cubillos L, Muñoz J, Caballero J, Mendoza M, Pulido A, Carpio K, et al. Addressing Severe  
990 Mental Illness Rehabilitation in Colombia, Costa Rica, and Peru. *Psychiatr Serv* [Internet]. 2020  
991 Apr 1;71(4):378–84. Available from:  
992 <https://psychiatryonline.org/doi/10.1176/appi.ps.201900306>
- 993 61. Monroy-Sánchez DC. Naturaleza del acceso a los servicios de salud mental de la población  
994 adulta víctima del conflicto armado en Colombia. *Revista Salud Bosque* [Internet]. 2020 Jul

- 995 22;10(1):1–15. Available from:  
996 <https://revistasaludbosque.unbosque.edu.co/article/view/3053/2416>
- 997 62. Salamanca-Sanabria A, Richards D, Timulak L, Connell S, Mojica Perilla M, Parra-Villa Y, et al. A  
998 Culturally Adapted Cognitive Behavioral Internet-Delivered Intervention for Depressive  
999 Symptoms: Randomized Controlled Trial. *JMIR Ment Health* [Internet]. 2020 Jan  
1000 31;7(1):e13392. Available from: <https://mental.jmir.org/2020/1/e13392>
- 1001 63. Zapata MA, Giraldo LF. [Methadone substitution treatment for heroin addiction: a program  
1002 assessment in Colombia]. *Adicciones* [Internet]. 2012;24(1):69–75. Available from:  
1003 <http://www.ncbi.nlm.nih.gov/pubmed/22508019>
- 1004 64. Vargas Díaz NS, Hincapié Molina ML, Secretaría Distrital de Salud de Bogotá DC. Atenciones  
1005 relacionadas con el consumo de sustancias psicoactivas en la población vinculada, desplazada  
1006 y atenciones no POS-S, 2006-2012 TT - Attentions Related with the Consumption of  
1007 Psychoactive Substances in the Population Linked, Displaced and Atten. *Investig segur soc*  
1008 *salud* [Internet]. 2014;16(2):5–17. Available from:  
1009 <http://app.saludcapital.gov.co/revistadigital/>
- 1010 65. Navarro - Jiménez E, Laborde - Cárdenas C, Gómez - Méndez P, Fontalvo Morales R.  
1011 Implementation of Clinical Practice Guideline (CPG) for early detection, diagnosis and  
1012 comprehensive care of the depressive episode and recurrent depressive disorder in adults at  
1013 Hospital Universitario Cari ESE Neurociencias de Barranquilla (Colombia). *Salud Uninorte*  
1014 [Internet]. 2016 Nov 15;32(3):429–35. Available from:  
1015 <http://rcientificas.uninorte.edu.co/index.php/salud/article/view/8416/9743>
- 1016 66. Sánchez Díaz N, Duarte Osorio A, Gómez Restrepo C, Bohórquez Peñaranda AP.  
1017 Implementacion de la guía de práctica clínica para el manejo de adultos con esquizofrenia en  
1018 Colombia. *Rev Colomb Psiquiatr* [Internet]. 2016 Apr;45(2):60–6. Available from:  
1019 <https://linkinghub.elsevier.com/retrieve/pii/S003474501500075X>
- 1020 67. Chaskel R, Shultz JM, Gaviria SL, Taborda E, Vanegas R, García NM, et al. Mental health law in  
1021 Colombia. *BJPsych Int* [Internet]. 2015 Nov 2;12(4):92–4. Available from:  
1022 [https://www.cambridge.org/core/product/identifier/S205647400000659/type/journal\\_](https://www.cambridge.org/core/product/identifier/S205647400000659/type/journal_article)  
1023 [artic](https://www.cambridge.org/core/product/identifier/S205647400000659/type/journal_article)  
[le](https://www.cambridge.org/core/product/identifier/S205647400000659/type/journal_article)
- 1024 68. Page MJ, Moher D, Bossuyt PM, Boutron I, Hoffmann TC, Mulrow CD, et al. PRISMA 2020  
1025 explanation and elaboration: updated guidance and exemplars for reporting systematic  
1026 reviews. *BMJ*. 2021 Mar 29;n160.
- 1027 69. Mejía-Trujillo J, Pérez-Gómez A, Reyes-Rodríguez MF. Implementation and adaptation in  
1028 Colombia of the Communities That Care. *Adicciones* [Internet]. 2015;27(4):253–64. Available  
1029 from: <https://pesquisa.bvsalud.org/portal/resource/es/mdl-26706808>
- 1030 70. Gómez Restrepo C, Maldonado P, Rodríguez N, Ruiz-Gaviria R, Escalante MÁ, Gómez RÁ, et al.  
1031 Therapeutic Communities In Latin America: An International Descriptive Study In Different  
1032 Countries Across Latin America. *Revista Colombiana de psiquiatria (English ed)* [Internet].  
1033 2018 Jul;47(3):140–7. Available from:  
1034 <https://linkinghub.elsevier.com/retrieve/pii/S0034745017300343>
- 1035 71. Shannon CL, Bartels SM, Cepeda M, Castro S, Cubillos L, Suárez-Obando F, et al. Perspectives  
1036 on the Implementation of Screening and Treatment for Depression and Alcohol Use Disorder

- 1037 in Primary Care in Colombia. *Community Ment Health J* [Internet]. 2021 Mar 4; Available  
1038 from: <http://link.springer.com/10.1007/s10597-021-00781-1>
- 1039 72. Borda JP, Gutiérrez LG, López L, Orrego DA. Evaluation of Methadone Maintenance Treatment  
1040 in Armenia, Colombia: A Cross-sectional Study Responding to a National Priority. *Addict*  
1041 *Disord Their Treat* [Internet]. 2021 Jun;20(2):91–7. Available from:  
1042 <https://journals.lww.com/10.1097/ADT.000000000000219>
- 1043 73. González G, Giraldo LF, DiGirolamo G, Rey CF, Correa LE, Cano AM, et al. Enfrentando el  
1044 problema emergente de consumo de heroína en Colombia: los nuevos programas de  
1045 tratamiento asistido con metadona. *Rev Colomb Psiquiatr* [Internet]. 2019 Apr;48(2):96–104.  
1046 Available from: <https://linkinghub.elsevier.com/retrieve/pii/S0034745017300938>
- 1047 74. Ceballos AMG, Andrade AC, Markowitz T, Verdeli H. ‘You Pulled Me out of a Dark Well’: A  
1048 Case Study of a Colombian Displaced Woman Empowered Through Interpersonal Counseling  
1049 (IPC). *J Clin Psychol* [Internet]. 2016 Aug;72(8):839–46. Available from:  
1050 <https://onlinelibrary.wiley.com/doi/10.1002/jclp.22365>
- 1051 75. Taborda Zapata EM, Montoya González LE, Gómez Sierra NM, Arteaga Morales LM, Correa  
1052 Rico OA. Intervención de la esquizofrenia desde el modelo comunitario. *Rev Colomb Psiquiatr*  
1053 [Internet]. 2016 Jan;45(1):46–50. Available from:  
1054 <https://linkinghub.elsevier.com/retrieve/pii/S0034745015001377>
- 1055 76. Martínez Pérez DC, Agudelo García ÁM, Andrade Carrillo R, García Cano JF, Porras Cataño SM.  
1056 Telesiquiatría: una experiencia exitosa en Antioquia, Colombia. *Rev Colomb Psiquiatr*  
1057 [Internet]. 2020 Oct;49(4):239–45. Available from:  
1058 [http://www.scielo.org.co/scielo.php?script=sci\\_arttext&pid=S0034-](http://www.scielo.org.co/scielo.php?script=sci_arttext&pid=S0034-74502020000400239&lang=es)  
1059 [74502020000400239&lang=es](http://www.scielo.org.co/scielo.php?script=sci_arttext&pid=S0034-74502020000400239&lang=es)
- 1060 77. Barrios-Acosta M, Ballesteros-Cabrera MDP, Zamora-Vásquez S, Franco Agudelo S, Gutierrez  
1061 Bonilla ML, Tatis Amaya J, et al. Universidad y conducta suicida: respuestas y propuestas  
1062 institucionales, Bogotá 2004-2014. *Revista de Salud Pública* [Internet]. 2017 Mar 1;19(2):153–  
1063 60. Available from:  
1064 <https://revistas.unal.edu.co/index.php/revsaludpublica/article/view/57001>
- 1065 78. Hernández Holguín DM, Páez Zapata E, Múnera Restrepo LM, Duque Ramírez LF. Diseño de un  
1066 programa basado en la promoción del desarrollo positivo en la infancia para la prevención  
1067 temprana de la violencia en Colombia. *Glob Health Promot* [Internet]. 2017 Mar 9;24(1):83–  
1068 91. Available from: <https://dx.doi.org/10.1177/1757975915591683>
- 1069 79. Castro SM, Cubillos L, Uribe-Restrepo JM, Suárez-Obando F, Meier A, Naslund JA, et al.  
1070 Assessing the Integration of Behavioral Health Services in Primary Care in Colombia. *Adm*  
1071 *Policy Ment Health* [Internet]. 2020 May 13;47(3):435–42. Available from:  
1072 <http://link.springer.com/10.1007/s10488-019-01002-4>
- 1073 80. Satizabal-Reyes M, Ortiz-Quiroga D. Mentalmente Sanos: Una experiencia con enfoque  
1074 comunitario. *Revista de Salud Pública* [Internet]. 2019 Jan 1;21(1):122–7. Available from:  
1075 <https://revistas.unal.edu.co/index.php/revsaludpublica/article/view/63309>
- 1076 81. Hong QN, Fàbregues S, Bartlett G, Boardman F, Cargo M, Dagenais P, et al. The Mixed  
1077 Methods Appraisal Tool (MMAT) version 2018 for information professionals and researchers.  
1078 *Education for Information*. 2018 Jan 1;34(4):285–91.

- 1079 82. Mejía-Trujillo J, Pérez-Gómez A, Reyes-Rodríguez MF. Implementation and adaptation in  
1080 Colombia of the Communities That Care. *Adicciones*. 2015;27(4):253–64.
- 1081 83. Shannon CL, Bartels SM, Cepeda M, Castro S, Cubillos L, Suárez-Obando F, et al. Perspectives  
1082 on the Implementation of Screening and Treatment for Depression and Alcohol Use Disorder  
1083 in Primary Care in Colombia. *Community Ment Health J*. 2021 Mar 4;
- 1084 84. Martínez Pérez DC, Agudelo García ÁM, Andrade Carrillo R, García Cano JF, Porras Cataño SM.  
1085 Telepsiquiatría: una experiencia exitosa en Antioquia, Colombia. *Rev Colomb Psiquiatr*. 2020  
1086 Oct;49(4):239–45.
- 1087 85. Borda JP, Gutiérrez LG, López L, Orrego DA. Evaluation of Methadone Maintenance Treatment  
1088 in Armenia, Colombia: A Cross-sectional Study Responding to a National Priority. *Addict*  
1089 *Disord Their Treat*. 2021 Jun;20(2):91–7.
- 1090 86. Ceballos AMG, Andrade AC, Markowitz T, Verdelli H. ‘You Pulled Me out of a Dark Well’: A  
1091 Case Study of a Colombian Displaced Woman Empowered Through Interpersonal Counseling  
1092 (IPC). *J Clin Psychol*. 2016 Aug;72(8):839–46.
- 1093 87. Satizabal-Reyes M, Ortiz-Quiroga D. Mentalmente Sanos: Una experiencia con enfoque  
1094 comunitario. *Revista de Salud Pública*. 2019 Jan 1;21(1):122–7.
- 1095 88. González G, Giraldo LF, DiGirolamo G, Rey CF, Correa LE, Cano AM, et al. Enfrentando el  
1096 problema emergente de consumo de heroína en Colombia: los nuevos programas de  
1097 tratamiento asistido con metadona. *Rev Colomb Psiquiatr*. 2019 Apr;48(2):96–104.
- 1098 89. Hernández DM, Duque LF, Restrepo A. [Design of a program for the positive development of  
1099 schoolchildren and characteristics of participants (Medellin, Colombia)]. TT - Diseño y  
1100 características de los participantes de un programa para el desarrollo positivo de escolares  
1101 (Medellín, Colombia). *Gac Sanit*. 2014;28(4):330–3.
- 1102 90. Satizabal-Reyes M, Ortiz-Quiroga D. [Mentalmente Sanos: an experience with a community  
1103 approach]. *Rev Salud Publica (Bogota)*. 2019 Nov 13;21(1):122–7.
- 1104 91. Hernández Holguín DM, Páez Zapata E, Múnera Restrepo LM, Duque Ramírez LF. Diseño de un  
1105 programa basado en la promoción del desarrollo positivo en la infancia para la prevención  
1106 temprana de la violencia en Colombia. *Glob Health Promot*. 2017 Mar 9;24(1):83–91.
- 1107 92. Gómez Restrepo C, Maldonado P, Rodríguez N, Ruiz-Gaviria R, Escalante MÁ, Gómez RÁ, et al.  
1108 Therapeutic Communities In Latin America: An International Descriptive Study In Different  
1109 Countries Across Latin America. *Revista Colombiana de psiquiatria (English ed)*. 2018  
1110 Jul;47(3):140–7.
- 1111 93. Taborda Zapata EM, Montoya González LE, Gómez Sierra NM, Arteaga Morales LM, Correa  
1112 Rico OA. Intervención de la esquizofrenia desde el modelo comunitario. *Rev Colomb Psiquiatr*.  
1113 2016 Jan;45(1):46–50.
- 1114 94. Frampton GK, Shepherd J, Pickett K, Griffiths G, Wyatt JC. Digital tools for the recruitment and  
1115 retention of participants in randomised controlled trials: a systematic map. *Trials*. 2020  
1116 Jun;21(1):478.
- 1117 95. Taborda Zapata E, Montoya Gonzalez LE, Gómez Sierra NM, Arteaga Morales LM, Correa Rico  
1118 OA. [Integrated management of patients with schizophrenia: beyond psychotropic drugs]. *Rev*  
1119 *Colomb Psiquiatr*. 2016;45(2):118–23.

- 1120 96. Gómez-Restrepo C, Cruz-Ramírez V, Medina-Rico M, Rincón CJ. Mental health in displaced  
1121 children by armed conflict - National Mental Health Survey Colombia 2015. *Actas Esp*  
1122 *Psiquiatr*. 2018 Mar;46(2):51–7.
- 1123 97. Public Health England. Health and wellbeing: a guide to community-centred approaches  
1124 [Internet]. London; 2015 Feb [cited 2021 Sep 5]. Available from:  
1125 [https://www.gov.uk/government/publications/health-and-wellbeing-a-guide-to-community-](https://www.gov.uk/government/publications/health-and-wellbeing-a-guide-to-community-centred-approaches)  
1126 [centred-approaches](https://www.gov.uk/government/publications/health-and-wellbeing-a-guide-to-community-centred-approaches)
- 1127 98. Stamboglis N, Jacobs R. Factors Associated with Patient Satisfaction of Community Mental  
1128 Health Services: A Multilevel Approach. *Community Ment Health J*. 2020;56(1):50–64.
- 1129 99. Jorge-Monteiro MF, Ornelas JH. “What’s Wrong with the Seed?” A Comparative Examination  
1130 of an Empowering Community-Centered Approach to Recovery in Community Mental Health.  
1131 *Community Ment Health J*. 2016;52(7):821–33.
- 1132 100. World Health Organization. Guidance on community mental health services: Promoting  
1133 person-centred and rights-based approaches. Geneva; 2021 Jun.
- 1134 101. Taborda Zapata E, Montoya Gonzalez LE, Gómez Sierra NM, Arteaga Morales LM, Correa Rico  
1135 OA. Manejo integral del paciente con esquizofrenia: más allá de los psicofármacos. *Rev*  
1136 *Colomb Psiquiatr* [Internet]. 2016 Apr;45(2):118–23. Available from:  
1137 <https://linkinghub.elsevier.com/retrieve/pii/S0034745015001110>
- 1138 102. de Silva MJ. Impact evaluations of mental health programmes: the missing piece in global  
1139 mental health. *J Epidemiol Community Health* (1978) [Internet]. 2015 May;69(5):405–7.  
1140 Available from: [https://jech.bmj.com/lookup/doi/10.1136/jech-](https://jech.bmj.com/lookup/doi/10.1136/jech-2014-203866)  
[2014-203866](https://jech.bmj.com/lookup/doi/10.1136/jech-2014-203866)
- 1141 103. Castrillón-Valderrutén M del C. Entre asilos y hospitales psiquiátricos. Una reflexión  
1142 historiográfica sobre el programa institucional de atención a la locura en Colombia TT -  
1143 Between nursing homes and psychiatric hospitals. A historiographical reflection on the  
1144 institutional program o. *Sociedad y Economía* [Internet]. 2020;(40):143–62. Available from:  
1145 [http://www.scielo.org.co/scielo.php?script=sci\\_arttext&pid=S1657-](http://www.scielo.org.co/scielo.php?script=sci_arttext&pid=S1657-63572020000200143&lang=es)  
1146 [63572020000200143&lang=es](http://www.scielo.org.co/scielo.php?script=sci_arttext&pid=S1657-63572020000200143&lang=es)
- 1147 104. Mills C. Decolonizing global mental health: The psychiatrization of the majority world  
1148 [Internet]. 1st ed. *Decolonizing Global Mental Health: The Psychiatrization of the Majority*  
1149 *World*. London: Routledge; 2014 [cited 2021 Aug 23]. 1–175 p. Available from:  
1150 [https://www.taylorfrancis.com/books/mono/10.4324/9780203796757/decolonizing-global-](https://www.taylorfrancis.com/books/mono/10.4324/9780203796757/decolonizing-global-mental-health-china-mills)  
1151 [mental-health-china-mills](https://www.taylorfrancis.com/books/mono/10.4324/9780203796757/decolonizing-global-mental-health-china-mills)
- 1152 105. Cohen BMZ. *Psychiatric hegemony: a Marxist theory of mental illness* / Bruce M.Z. Cohen.  
1153 2016.
- 1154 106. Ordoñez-Vargas L, Cortés-García CM. Medicalización psiquiátrica en tres prisiones femeninas  
1155 brasileras: un abordaje etnográfico sobre los itinerarios de criminalización, patologización y  
1156 farmacologización. *Salud Colect* [Internet]. 2020 Aug 20;16:e2507. Available from:  
1157 <http://revistas.unla.edu.ar/saludcolectiva/article/view/2507>
- 1158 107. Vera San Juan N, Mena H C, Rezende Andrade MC. Panorámica del concepto de recuperación  
1159 (recovery) y evidencia en América Latina. *Revista Latinoamericana de Psiquiatría* [Internet].  
1160 2021 [cited 2021 Sep 5];20(2). Available from: [www.webapal.org](http://www.webapal.org)

- 1161 108. Centre for Mental Health - Department of Health, Mind, NHS Confederation Mental Health  
1162 Network, Rethink Mental Illness, Turning Point. No health without mental health:  
1163 implementation framework [Internet]. Department of Health; 2012 Jul [cited 2021 Dec 29].  
1164 Available from: <https://dera.ioe.ac.uk/15016/?view=primo>
- 1165 109. American Psychological Association. What are Telehealth and Telepsychology? [Internet].  
1166 2014 [cited 2022 Jan 10]. Available from:  
1167 <https://www.apa.org/pi/disability/resources/publications/telepsychology>
- 1168 110. Torrey WC, Cepeda M, Castro S, Bartels SM, Cubillos L, Obando FS, et al. Implementing  
1169 technology-supported care for depression and alcohol use disorder in primary care in  
1170 Colombia: Preliminary findings. *Psychiatric Services*. 2020;71(7):678–83.
- 1171 111. Appleton R, Williams J, Juan NVS, Needle JJ, Schlieff M, Jordan H, et al. Implementation,  
1172 adoption and perceptions of telemental health during the COVID-19 pandemic: a systematic  
1173 review. *medRxiv* [Internet]. 2021 Jul 6 [cited 2021 Aug 19];2021.07.05.21260018. Available  
1174 from: <https://www.medrxiv.org/content/10.1101/2021.07.05.21260018v1>
- 1175 112. Cowan KE, McKean AJ, Gentry MT, Hilty DM. Barriers to Use of Telepsychiatry: Clinicians as  
1176 Gatekeepers. *Mayo Clin Proc* [Internet]. 2019 Dec;94(12):2510–23. Available from:  
1177 <https://linkinghub.elsevier.com/retrieve/pii/S0025619619304008>
- 1178 113. Acharibasam JW, Wynn R. Telemental Health in Low- and Middle-Income Countries: A  
1179 Systematic Review. *Int J Telemed Appl* [Internet]. 2018 Nov 1;2018:1–10. Available from:  
1180 <https://www.hindawi.com/journals/ijta/2018/9602821/>
- 1181 114. LeRouge CM, Gupta M, Corpart G, Arrieta A. Health System Approaches Are Needed To  
1182 Expand Telemedicine Use Across Nine Latin American Nations. *Health Aff* [Internet]. 2019  
1183 Feb;38(2):212–21. Available from:  
1184 <http://www.healthaffairs.org/doi/10.1377/hlthaff.2018.05274>
- 1185 115. Myers CR. Using Telehealth to Remediate Rural Mental Health and Healthcare Disparities.  
1186 *Issues Ment Health Nurs* [Internet]. 2019 Mar 4;40(3):233–9. Available from:  
1187 <https://www.tandfonline.com/doi/full/10.1080/01612840.2018.1499157>
- 1188 116. Siegel A, Zuo Y, Moghaddamcharkari N, McIntyre RS, Rosenblat JD. Barriers, benefits and  
1189 interventions for improving the delivery of telemental health services during the coronavirus  
1190 disease 2019 pandemic: a systematic review. *Curr Opin Psychiatry* [Internet]. 2021  
1191 Jul;34(4):434–43. Available from: <https://journals.lww.com/10.1097/YCO.0000000000000714>
- 1192 117. Shannonhouse L, Zeligman M, Scherma H, Luke M, Schweiger W, McDonald CP, et al. Mental  
1193 health facilitator service implementation in Mexico: a community mental health strategy.  
1194 *Journal of counselor leadership and advocacy*. 2019;6(2):114–28.
- 1195 118. Aceituno D, Mena C, Vera N, Gonzalez-Valderrama A, Gadelha A, Diniz E, et al.  
1196 Implementation of early psychosis services in Latin America: A scoping review. *Early Interv*  
1197 *Psychiatry* [Internet]. 2021 Oct 13 [cited 2021 Sep 5];15(5):1104–14. Available from:  
1198 <https://onlinelibrary.wiley.com/doi/full/10.1111/eip.13060>
- 1199 119. Schinnar AP, Kamis-Gould E, Delucia N, Rothbard AB, Special Assistant is. Organizational  
1200 determinants of efficiency and effectiveness in mental health partial care programs. *Health*  
1201 *Serv Res* [Internet]. 1990 Jun [cited 2022 May 6];25(2):387. Available from:  
1202 </pmc/articles/PMC1065634/?report=abstract>



- 1203 120. Aarons GA, Sawitzky AC. Organizational climate partially mediates the effect of culture on  
1204 work attitudes and staff turnover in mental health services. *Administration and Policy in*  
1205 *Mental Health and Mental Health Services Research* [Internet]. 2006 May 17 [cited 2022 May  
1206 6];33(3):289–301. Available from: [https://link.springer.com/article/10.1007/s10488-006-](https://link.springer.com/article/10.1007/s10488-006-0039-1)  
1207 0039-1
- 1208 121. Borda JP, Gutiérrez LG, López L, Orrego DA. Evaluation of methadone maintenance treatment  
1209 in Armenia, Colombia: A cross-sectional study responding to a national priority. *Addict Disord*  
1210 *Their Treat.* 2020;
- 1211 122. Proctor EK, Landsverk J, Aarons G, Chambers D, Glisson C, Mittman B. Implementation  
1212 Research in Mental Health Services: an Emerging Science with Conceptual, Methodological,  
1213 and Training challenges. *Administration and Policy in Mental Health and Mental Health*  
1214 *Services Research* [Internet]. 2009 Jan 23;36(1):24–34. Available from:  
1215 <http://link.springer.com/10.1007/s10488-008-0197-4>
- 1216 123. Hyde J. Lessons from Australia in the public funding of mental health services [Internet]. Vol.  
1217 55, *Canadian Psychology*. 2014 [cited 2021 Sep 6]. p. 139–43. Available from:  
1218 <http://www.hwa.gov.au/>
- 1219 124. Acharya B, Maru D, Schwarz R, Citrin D, Tenpa J, Hirachan S, et al. Partnerships in mental  
1220 healthcare service delivery in low-resource settings: developing an innovative network in rural  
1221 Nepal. *Global Health* [Internet]. 2017 Dec 13 [cited 2021 Sep 6];13(1):2. Available from:  
1222 [https://go.gale.com/ps/i.do?p=AONE&sw=w&issn=17448603&v=2.1&it=r&id=GALE%7CA480](https://go.gale.com/ps/i.do?p=AONE&sw=w&issn=17448603&v=2.1&it=r&id=GALE%7CA480559659&sid=googleScholar&linkaccess=fulltext)  
1223 559659&sid=googleScholar&linkaccess=fulltext
- 1224 125. World Health Organization. Mental health action plan 2013 - 2020 [Internet]. Mental health  
1225 action plan 2013 - 2020. Geneva; 2013 Jan [cited 2021 Aug 23]. Available from:  
1226 <https://www.who.int/publications/i/item/9789241506021>
- 1227 126. Brach C, Lenfestey N, Roussel A, Amoozegar J, Sorenson A. Will It Work Here? A  
1228 Decisionmaker’s Guide to Adopting Innovations [Internet]. RTI International for the Agency  
1229 for Healthcare Research and Quality (AHRQ). Rockville; 2008 Sep [cited 2021 Sep 6]. Available  
1230 from: [https://www.ahrq.gov/sites/default/files/wysiwyg/innovations/will-](https://www.ahrq.gov/sites/default/files/wysiwyg/innovations/will-work/InnovationAdoptionGuide.pdf)  
1231 work/InnovationAdoptionGuide.pdf
- 1232 127. Rondon MB. From Marianism to terrorism: the many faces of violence against women in Latin  
1233 America. *Arch Womens Ment Health* [Internet]. 2003 Aug 1;6(3):157–63. Available from:  
1234 <http://link.springer.com/10.1007/s00737-003-0169-3>
- 1235 128. Nuñez A, González P, Talavera GA, Sanchez-Johnsen L, Roesch SC, Davis SM, et al. Machismo,  
1236 marianismo, and negative cognitive-emotional factors: Findings from the Hispanic Community  
1237 Health Study/Study of Latinos Sociocultural Ancillary Study. *J Lat Psychol* [Internet]. 2016  
1238 Nov;4(4):202–17. Available from: <http://doi.apa.org/getdoi.cfm?doi=10.1037/lat0000050>
- 1239 129. Ascencio E. The Effects of Machismo, Marianismo and Minority Stress on The Effects of  
1240 Machismo, Marianismo and Minority Stress on Mental Health in the Latinx LGBTQ+  
1241 Community Mental Health in the Latinx LGBTQ+ Community [Internet]. [Claremont]: Scripps  
1242 College; 2020 [cited 2022 Sep 29]. Available from:  
1243 [https://scholarship.claremont.edu/cgi/viewcontent.cgi?article=2682&context=scripps\\_theses](https://scholarship.claremont.edu/cgi/viewcontent.cgi?article=2682&context=scripps_theses)

- 1244 130. Llanes M. Beyond Machismo: Intersectional Latino Masculinities [Internet]. Vol. 20, Identity  
1245 article collection. SAGE Publications; 2021 [cited 2022 Sep 29]. p. 0. Available from:  
1246 [https://www.supportiv.com/identity/machismo-and-mental-health-in-2nd-gen-latinx-](https://www.supportiv.com/identity/machismo-and-mental-health-in-2nd-gen-latinx-communities)  
1247 [communities](https://www.supportiv.com/identity/machismo-and-mental-health-in-2nd-gen-latinx-communities)
- 1248 131. Fernando S. Race and culture issues in mental health and some thoughts on ethnic identity.  
1249 *Couns Psychol Q* [Internet]. 2012 Jun;25(2):113–23. Available from:  
1250 <http://www.tandfonline.com/doi/abs/10.1080/09515070.2012.674299>
- 1251 132. Tran AGTT. Race/ethnicity and Stigma in Relation to Unmet Mental Health Needs among  
1252 Student-athletes. *J College Stud Psychother* [Internet]. 2021 Feb 17;1–18. Available from:  
1253 <https://www.tandfonline.com/doi/full/10.1080/87568225.2021.1881859>
- 1254 133. Bryant BE, Jordan A, Clark US. Race as a Social Construct in Psychiatry Research and Practice.  
1255 *JAMA Psychiatry* [Internet]. 2022 Feb 1;79(2):93. Available from:  
1256 <https://jamanetwork.com/journals/jamapsychiatry/fullarticle/2786973>
- 1257 134. Flores RJ, Campo-Arias A, Stimpson JP, Chalela CM, Reyes-Ortiz CA. The Association Between  
1258 Past Sexual Abuse and Depression in Older Adults From Colombia. *J Geriatr Psychiatry Neurol*.  
1259 2018;31(1):13–8.
- 1260 135. Giebel C, Zuluaga MI, Saldarriaga G, White R, Reilly S, Montoya E, et al. Understanding post-  
1261 conflict mental health needs and co-producing a community-based mental health  
1262 intervention for older adults in Colombia: a research protocol. *BMC Health Serv Res* [Internet].  
1263 2022 Dec 1 [cited 2022 Sep 23];22(1):1–7. Available from:  
1264 <https://bmchealthservres.biomedcentral.com/articles/10.1186/s12913-022-07645-8>
- 1265 136. Zamora-Moncayo E, Burgess RA, Fonseca L, González-Gort M, Kakuma R. Gender, mental  
1266 health and resilience in armed conflict: listening to life stories of internally displaced women  
1267 in Colombia. *BMJ Glob Health* [Internet]. 2021 Oct 1 [cited 2022 Sep 29];6(10):e005770.  
1268 Available from: <https://gh.bmj.com/content/6/10/e005770>
- 1269 137. Chaskel R, Gaviria SL, Espinel Z, Taborda E, Vanegas R, Shultz JM. Mental health in Colombia.  
1270 *BJPsych Int* [Internet]. 2015 Nov [cited 2022 Sep 23];12(4):95. Available from:  
1271 </pmc/articles/PMC5618872/>
- 1272 138. Cuartas Ricaurte J, Karim LL, Martínez Botero MA, Hessel P. The invisible wounds of five  
1273 decades of armed conflict: inequalities in mental health and their determinants in Colombia.  
1274 *Int J Public Health* [Internet]. 2019 Jun 22;64(5):703–11. Available from:  
1275 <http://link.springer.com/10.1007/s00038-019-01248-7>
- 1276 139. Santaella-Tenorio J, Bonilla-Escobar FJ, Nieto-Gil L, Fandinó-Losada A, Gutiérrez-Martínez MI,  
1277 Bass J, et al. Mental health and psychosocial problems and needs of violence survivors in the  
1278 Colombian Pacific Coast: A qualitative study in Buenaventura and Quibdó. *Prehosp Disaster*  
1279 *Med*. 2018;33(6):567–74.
- 1280 140. Consejo Nacional de Política Económica y Social. Estrategia para la promoción de la salud  
1281 mental en Colombia [Internet]. Departamento Nacional de Planeación. Bogotá; 2020 Apr  
1282 [cited 2021 Sep 6]. Available from:  
1283 <https://colaboracion.dnp.gov.co/CDT/Conpes/Economicos/3992.pdf>

1284

## Identification of studies via databases and registers

Identification

Records identified from: BVS (443), Scopus (328), Scielo (79), (103) Medline (OVID) (103) & PubMed (577)

Databases (n = 5)  
Registers (n = 1530)

Records removed *before screening*:

Duplicate records removed (n = 377)  
Records marked as ineligible by automation tools (n = 0)  
Records removed for other reasons (n = 0)

Screening

Records screened (n = 1153)

Records excluded\*\* (n = 1121)

Reports assessed for eligibility (n = 32)

Reports excluded:  
Reason 1: No description of mental health services (n=15)  
Reason 2: focused on characterizing mental health disorders (prevalence / incidence rates) (n = 2)  
Reason 3: Not implemented. Recommendations only (n = 2)  
Reason 4: Editorial or comments. (n= 1)

Included

Studies included in review (n = 12)
